# Supplementary material for: The hallmarks of childhood abuse and neglect: A systematic review
Source: PubMed Central journal article supplement (PMC7723263; doi:10.1371/journal.pone.0243639), 2020-12-08
Supplement: pone.0243639.s001.pdf [file pone.0243639.s001.pdf]

Supplementary Table- Details of Medium Quality Articles

| Citation        | Year | Category       | Type of abuse investigated | Review Type       | Number of included studies | Number of participants in meta-analysis | Summary of result                                                                                                                                                                                                                                                    |
|-----------------|------|----------------|----------------------------|-------------------|----------------------------|-----------------------------------------|----------------------------------------------------------------------------------------------------------------------------------------------------------------------------------------------------------------------------------------------------------------------|
| Abajobirv[1]    | 2017 | Social Factors | Sexual Abuse               | Meta-analysis     | 8                          | 38,989                                  | Sexual abuse associated with greater risk of risky sexual behaviours in adulthood (OR=1.59, 95% CI=1.41-1.80). Overall there was no significant difference males vs females but the association was greater in females when limited to substantiated cases of abuse. |
| Agnew-Blais [2] | 2016 | Body & Mind    | Combination                | Meta-analysis     | 30                         | 5733                                    | Childhood maltreatment associated with greater risk of adverse outcomes in adults with bipolar affective disorder                                                                                                                                                    |
| Bayrampour [3]  | 2018 | Body & Mind    | Combination                | Systematic Review | 101                        | N/A                                     | Childhood abuse identified as a risk factor for antenatal anxiety.                                                                                                                                                                                                   |
| Bolen [4]       | 2015 | Social Factors | Sexual Abuse               | Meta-analysis     | 29                         | 1199                                    | Explored relationship of non-offending caregiver support and functioning after disclosure of childhood sexual abuse. No clear association identified.                                                                                                                |

|                 |      |                |             |                   |    |        |                                                                                                                                                                                                                                 |
|-----------------|------|----------------|-------------|-------------------|----|--------|---------------------------------------------------------------------------------------------------------------------------------------------------------------------------------------------------------------------------------|
| Bonoldi [5]     | 2013 | Body & Mind    | Combination | Meta-analysis     | 23 | 2017   | Pooled estimates of prevalence of childhood abuse in adults with psychosis was: sexual abuse=26.3%, physical abuse=38.8%, emotional abuse=34%. Significant heterogeneity identified.                                            |
| Braga [6]       | 2018 | Social Factors | Combination | Meta-Analysis     | 14 | 20,946 | Childhood maltreatment associated with greater risk of adult antisocial behaviour (OR=1.96, 95% CI=1.42-2.71).                                                                                                                  |
| Braithwaite [7] | 2017 | Body & Mind    | Combination | Meta-analysis     | 22 | 12,210 | Childhood maltreatment associated with increased risk of depression (OR=1.50, 95% CI- 1.32-1.70). Interpersonal relationships, cognitive difficulties and behavioural difficulties identified as possible modifiable mediators. |
| Bunting [8]     | 2018 | Social Factors | Combination | Systematic Review | 13 | N/A    | All forms of maltreatment were associated with some form of adult economic insecurity (eg.                                                                                                                                      |

|                     |      |                     |             |                   |    |         |                                                                                                                                                                           |
|---------------------|------|---------------------|-------------|-------------------|----|---------|---------------------------------------------------------------------------------------------------------------------------------------------------------------------------|
|                     |      |                     |             |                   |    |         | Unemployment, low income, sickness absence).                                                                                                                              |
| Butt [9]            | 2011 | Body & Mind         | Combination | Systematic Review | 18 | N/A     | No consistent association of physical or sexual abuse with illicit drug use.                                                                                              |
| Coelho [10]         | 2014 | Biochemical Changes | Combination | Systematic Review | 20 | N/A     | Reviewed association of childhood maltreatment with inflammatory markers. Significant heterogeneity in study design and markers used. Strongest association for CRP       |
| Conrad-Hiebner [11] | 2018 | Social Factors      | Combination | Systematic Review | 26 | N/A     | Economic insecurity (as measured by income loss, material hardship, or housing hardship) associated with greater risk of child maltreatment.                              |
| Danase [12]         | 2014 | Body & Mind         | Combination | Meta-analysis     | 41 | 190,285 | Childhood maltreatment associated with greater risk of obesity throughout the life course (OR=1.36 95% CI: 1.26-1.47). Stronger association in women and white ethnicity. |

|               |      |                |              |                   |    |     |                                                                                                                                                                                                                 |
|---------------|------|----------------|--------------|-------------------|----|-----|-----------------------------------------------------------------------------------------------------------------------------------------------------------------------------------------------------------------|
| Domhardt [13] | 2015 | Social Factors | Sexual Abuse | Systematic Review | 37 | N/A | 10-53% of survivors of childhood sexual abuse found to be resilient (variously defined good functioning). Predictors included family and social support, education, and interpersonal and emotional competence. |
| Dualibe [14]  | 2017 | Body & Mind    | Combination  | Systematic Review | 28 | N/A | Explored association of early abuse and bipolar affective disorder. Prevalence of abuse ~40% in adults with bipolar. Studies have associated abuse with early onset, rapid cycling and comorbidity.             |
| Edalati [15]  | 2017 | Social Factors | Combination  | Systematic Review | 20 | N/A | Included studies identified association of childhood maltreatment with criminal justice involvement and victimisation amongst homeless adults. Association greatest for physical and sexual abuse.              |

|                  |      |             |             |                   |     |         |                                                                                                                                                                                               |
|------------------|------|-------------|-------------|-------------------|-----|---------|-----------------------------------------------------------------------------------------------------------------------------------------------------------------------------------------------|
| Fry [16]         | 2012 | Body & Mind | Combination | Systematic Review | 106 | N/A     | Review of impacts of childhood abuse on children in East Asian and the Pacific. Identified increased risk of mental and physical health problems, suicide attempts, and behavioural problems. |
| Hauser [17]      | 2011 | Body & Mind | Combination | Systematic Review | 18  | N/A     | Association with physical and sexual abuse and risk of fibromyalgia identified in most studies but confounded by poor quality.                                                                |
| Hemmingsson [18] | 2014 | Body & Mind | Combination | Meta-analysis     | 23  | 112,708 | Childhood abuse associated with greater risk of adult obesity (OR=1.34, 95%CI=1.24,1.45). Associated greater with increased severity of abuse.                                                |
| Huang [19]       | 2015 | Body & Mind | Combination | Meta-analysis     | 7   | 87,251  | Childhood maltreatment associated with increased risk of type 2 diabetes                                                                                                                      |

|                |      |                |                |                   |    |        |                                                                                                                                                                                                    |
|----------------|------|----------------|----------------|-------------------|----|--------|----------------------------------------------------------------------------------------------------------------------------------------------------------------------------------------------------|
|                |      |                |                |                   |    |        | (OR=1.32, 95%CI=1.16-1.51)                                                                                                                                                                         |
| Hugill [20]    | 2017 | Social Factors | Sexual Abuse   | Systematic Review | 14 | N/A    | Included studies identified an association between childhood sexual abuse and later parenting stress. Suggests that association is mostly mediating by depression, stressors, and other variables. |
| Hutchens [21]  | 2017 | Body & Mind    | Combination    | Systematic Review | 16 | N/A    | Majority of studies found an association of childhood abuse with greater risk of post-partum depression.                                                                                           |
| Ip [22]        | 2016 | Body & Mind    | Physical Abuse | Meta-analysis     | 22 | 17,234 | Childhood physical abuse associated with increased risk of adverse mental health outcomes (OR=2.16, 95% CI=1.87-2.49). Significant heterogeneity identified.                                       |
| Jespersen [23] | 2009 | Social Factors | Sexual Abuse   | Meta-analysis     | 24 | 5095   | Sexual abuse associated with increased risk of sexual offending (OR=3.36, 95%CI-2.34-4.82). Abuse also linked to                                                                                   |

|               |      |                    |                 |                   |    |        |                                                                                                                                                                                                                                                                              |
|---------------|------|--------------------|-----------------|-------------------|----|--------|------------------------------------------------------------------------------------------------------------------------------------------------------------------------------------------------------------------------------------------------------------------------------|
|               |      |                    |                 |                   |    |        | greater risk of offences against children.                                                                                                                                                                                                                                   |
| Khaleque [24] | 2015 | Body & Mind        | Combination     | Meta-analysis     | 33 | 11,755 | Perceived parental neglect associated with psychological maladjustment and negative personality dispositions.                                                                                                                                                                |
| Kimber [25]   | 2017 | Body & Mind        | Emotional Abuse | Systematic Review | 23 | N/A    | Prevalence of emotional abuse and neglect amongst adults with eating disorder ranged from 21.0% to 66.0%. Significant heterogeneity in literature.                                                                                                                           |
| Lang [26]     | 2019 | Genes & Epigenomes | Combination     | Systematic Review | 37 | N/A    | There is clear evidence replicated for the important role of epigenetic modification of NR3C1 and to a lesser extend genes associated with serotonin, in association with ACE exposure. The link to telomeres is less clear. Further study of other mechanisms of epigenetic |



|              |      |                    |             |               |    |            |                                                                                                                                                                                                |
|--------------|------|--------------------|-------------|---------------|----|------------|------------------------------------------------------------------------------------------------------------------------------------------------------------------------------------------------|
|              |      |                    |             |               |    |            | modification is recommended.                                                                                                                                                                   |
| Li [27]      | 2017 | Genes & Epigenomes | Combination | Meta-analysis | 24 | 30,919     | Small but significant association of childhood abuse with accelerated telomere erosion in adulthood ( $r=-0.05$ , $p<0.001$ ).                                                                 |
| Lindert [28] | 2014 | Body & Mind        | Combination | Meta-analysis | 19 | 115,579    | Childhood abuse associated with increased risk of depression and anxiety. Greatest effect size with sexual abuse (depression OR=2.04, 95%CI=1.65-2.53; anxiety OR=2.52 95%CI=2.12-2.98)        |
| Liu [29]     | 2017 | Body & Mind        | Combination | Meta-analysis | 16 | Not stated | Childhood abuse associated with increased risk of suicidal behaviour (OR=1.36, 95%CI=1.26,1.47). This was significant for all subtypes of abuse with greatest effect size from emotional abuse |

|               |      |                |              |                   |    |        |                                                                                                                                                        |
|---------------|------|----------------|--------------|-------------------|----|--------|--------------------------------------------------------------------------------------------------------------------------------------------------------|
| Lloyd [30]    | 2012 | Social Factors | Sexual Abuse | Meta-analysis     | 12 | 15,622 | Amongst men who have sex with men, childhood sexual abuse associated with greater risk of risky sexual behaviours and higher rates of HIV infection    |
| Mandelli [31] | 2015 | Body & Mind    | Combination  | Meta-analysis     | 26 | 35,772 | Childhood maltreatment associated with risk of depression in adulthood. Highest effect size with neglect.                                              |
| Maniglio [32] | 2015 | Social Factors | Sexual Abuse | Systematic Review | 36 | N/A    | Childhood sexual abuse associated with conduct disorder in all studies and remained significant after adjusting for confounders. ORs ranged from 2-12. |
| Maniglio [33] | 2013 | Body & Mind    | Sexual Abuse | Systematic Review | 4  | N/A    | Childhood sexual abuse associated with increased risk for all anxiety disorders, particularly PTSD. No difference by gender or abuse severity.         |
| Maniglio [34] | 2013 | Body & Mind    | Sexual Abuse | Systematic Review | 18 | N/A    | Explored association of childhood sexual abuse with outcomes in bipolar                                                                                |

|                |      |             |              |                   |    |         |                                                                                                                                                                                      |
|----------------|------|-------------|--------------|-------------------|----|---------|--------------------------------------------------------------------------------------------------------------------------------------------------------------------------------------|
|                |      |             |              |                   |    |         | affective disorder. CSA associated with with comorbid PTSD, inconsistent findings relating to severity markers and comorbidity.                                                      |
| McTavish [35]  | 2019 | Body & Mind | Sexual Abuse | Systematic Review | 22 | N/A     | Highlights limitations in literature around disclosure in PTSD with lack of longitudinal data a particular concern.                                                                  |
| Midei [36]     | 2011 | Body & Mind | Combination  | Systematic Review | 36 | 138,746 | Childhood sexual abuse and physical abuse associated with obesity. Suggests pathway mediated by disordered eating and emotional dysregulation rather than reduced physical activity. |
| Molendijk [37] | 2017 | Body & Mind | Combination  | Meta-analysis     | 82 | 35,887  | Higher rates of childhood maltreatment in adults with eating disorders compared to other mental illnesses (OR=1.31, 95%CI=1.08-1.58). Childhood maltreatment associated with eating  |

|                 |      |                |             |                   |    |        |                                                                                                                                                                                            |
|-----------------|------|----------------|-------------|-------------------|----|--------|--------------------------------------------------------------------------------------------------------------------------------------------------------------------------------------------|
|                 |      |                |             |                   |    |        | disorder severity and comorbidity.                                                                                                                                                         |
| Montgomery [38] | 2019 | Social Factors | Combination | Systematic Review | 15 | N/A    | Prevalence of child abuse increased in populations exposed to traumatic events. Range of trauma exposures included childhood abuse, genocide, warfare etc                                  |
| Nanni [39]      | 2012 | Body & Mind    | Combination | Meta-analysis     | 26 | 26,642 | Childhood maltreatment associated with risk of recurrent and persistent depressive episodes (OR=2.27, 95%CI=1.80-2.87) and with risk of treatment resistance (OR=1.43, 95%CI-1.11-1.83).   |
| Naughton [40]   | 2013 | Body & Mind    | Combination | Systematic Review | 42 | N/A    | Review of emotional, behavioural and developmental features of neglect and/or emotional abuse in pre-school children. Identified variety of features including attachment style, cognitive |

|                   |      |                |              |                   |     |        |                                                                                                                               |
|-------------------|------|----------------|--------------|-------------------|-----|--------|-------------------------------------------------------------------------------------------------------------------------------|
|                   |      |                |              |                   |     |        | development, and peer relations.                                                                                              |
| Rafiq [41]        | 2018 | Body & Mind    | Combination  | Meta-analysis     | 30  | 2199   | Moderate association of childhood abuse and dissociative experience in adults with severe mental illnesses (r=0.33, p<0.001). |
| Rhodes [42]       | 2011 | Body & Mind    | Sexual Abuse | Systematic Review | 16  | N/A    | Childhood Sexual Abuse associated with risk of suicide, effect may be greater in boys.                                        |
| Schneeberger [43] | 2014 | Social Factors | Combination  | Systematic Review | 73  | N/A    | LGBT populations report greater rates of childhood maltreatment of all types.                                                 |
| Sonneveld [44]    | 2013 | Body & Mind    | Sexual Abuse | Systematic Review | 2   | N/A    | Prevalence of sexual abuse in children with chronic abdominal pain ranged from 2-8%.                                          |
| Varese [45]       | 2012 | Body & Mind    | Combination  | Meta-analysis     | 41  | 81,253 | Childhood abuse and neglect associated with increased risk of psychosis OR=2.89, 95% CI=2.34-3.31)                            |
| Viola [46]        | 2016 | Social Factors | Combination  | Meta-analysis     | 288 | 59,692 | CTQ scores were significantly lower in                                                                                        |

|  |  |  |  |  |  |  |                                                                                                                                                            |
|--|--|--|--|--|--|--|------------------------------------------------------------------------------------------------------------------------------------------------------------|
|  |  |  |  |  |  |  | Europe and Asia compared to other continents (particularly South America). Association identified of greater GDP with lower mean CTQ scores in population. |
|--|--|--|--|--|--|--|------------------------------------------------------------------------------------------------------------------------------------------------------------|

- 1- Abajobir, A. A., Kisely, S., Maravilla, J. C., Williams, G., & Najman, J. M. (2017). Gender differences in the association between childhood sexual abuse and risky sexual behaviours: A systematic review and meta-analysis. *Child Abuse & Neglect*, *63*, 249-260. doi:<https://dx.doi.org/10.1016/j.chiabu.2016.11.023>
- 2- AgnewBlais, J., & Danese, A. (2016). Childhood maltreatment and unfavourable clinical outcomes in bipolar disorder: A systematic review and meta-analysis. *The Lancet Psychiatry*, *3*(4), 342-349. doi:<http://dx.doi.org/10.1016/S2215-0366%2815%2900544-1>
- 3- Bayrampour, H., Vinturache, A., Hetherington, E., Lorenzetti, D. L., & Tough, S. (2018). Risk factors for antenatal anxiety: A systematic review of the literature. *Journal of Reproductive & Infant Psychology*, *36*(5), 476-503. doi:<https://dx.doi.org/10.1080/02646838.2018.1492097>
- 4- Bolen, R. M., & Gergely, K. B. (2015). A meta-analytic review of the relationship between non-offending caregiver support and post-disclosure functioning in sexually abused children. *Trauma, Violence, & Abuse*, *16*(3), 258-279. doi:<http://dx.doi.org/10.1177/1524838014526307>
- 5- Bonoldi, I., Simeone, E., Rocchetti, M., Codjoe, L., Rossi, G., Gambi, F., Fusar-Poli, P. (2013). Prevalence of self-reported childhood abuse in psychosis: A meta-analysis of retrospective studies. *Psychiatry Research*, *210*(1), 8-15. doi:<http://dx.doi.org/10.1016/j.psychres.2013.05.003>
- 6- Braga T., Cunha O., & Maia, A. (2018). The enduring effect of maltreatment on antisocial behavior: A meta-analysis of longitudinal studies. *Aggression and Violent Behavior*, *40*, 91-100. doi:<http://dx.doi.org/10.1016/j.avb.2018.04.003>

- 7- Braithwaite, E. C., O'Connor, R. M., Degli-Esposti, M., Luke, N., & Bowes, L. (2017). Modifiable predictors of depression following childhood maltreatment: A systematic review and meta-analysis. *Transl Psychiatry Psychiatry*, 7(7), e1162.  
doi:<https://dx.doi.org/10.1038/tp.2017.140>
- 8- Bunting, L., Davidson, G., McCartan, C., Hanratty, J., Bywaters, P., Mason, W., & Steils, N. (2018). The association between child maltreatment and adult poverty-A systematic review of longitudinal research. *Child Abuse & Neglect*, 77, 121-133.  
doi:<http://dx.doi.org/10.1016/j.chiabu.2017.12.022>
- 9- Butt, S., Chou, S., & Browne, K. (2011). A rapid systematic review on the association between childhood physical and sexual abuse and illicit drug use among males. *Child Abuse Review*, 20(1), 6-38. doi:<http://dx.doi.org/10.1002/car.1100>
- 10- Coelho, R., Viola, T. W., WalssBass, C., Brietzke, E., & GrassiOliveira, R. (2014). Childhood maltreatment and inflammatory markers: A systematic review. *Acta Psychiatrica Scandinavica*, 129(3), 180-192. doi:<http://dx.doi.org/10.1111/acps.12217>
- 11- Conrad-Hiebner, A., & Byram, E. (2018). The temporal impact of economic insecurity on child maltreatment: A systematic review. *Trauma Violence & Abuse*, 1524838018756122  
doi:<https://dx.doi.org/10.1177/1524838018756122>
- 12- Danese, A., & Tan, M. (2014). Childhood maltreatment and obesity: Systematic review and meta-analysis. *Molecular Psychiatry*, 19(5), 544-554.  
doi:<https://dx.doi.org/10.1038/mp.2013.54>
- 13- Domhardt, M., Munzer, A., Fegert, J. M., & Goldbeck, L. (2015). Resilience in survivors of child sexual abuse: A systematic review of the literature. *Trauma, Violence, & Abuse*, 16(4), 476-493. doi:<http://dx.doi.org/10.1177/1524838014557288>



- 14- Dualibe, A. L., & Osorio, F. L. (2017). Bipolar disorder and early emotional trauma: A critical literature review on indicators of prevalence rates and clinical outcomes. *Harvard Review of Psychiatry*, 25(5), 198-208.  
doi:<http://dx.doi.org/10.1097/HRP.0000000000000154>
- 15- Edalati, H., & Nicholls, T. L. (2017). Childhood maltreatment and the risk for criminal justice involvement and victimization among homeless individuals: A systematic review. *Trauma Violence & Abuse*, 1524838017708783  
doi:<https://dx.doi.org/10.1177/1524838017708783>
- 16- Fry, D., McCoy, A., & Swales, D. (2012). The consequences of maltreatment on children's lives: A systematic review of data from the east asia and pacific region. *Trauma Violence & Abuse*, 13(4), 209-233.  
doi:<https://dx.doi.org/10.1177/1524838012455873>
- 17- Hauser, W., Kosseva, M., Uceyler, N., Klose, P., & Sommer, C. (2011). Emotional, physical, and sexual abuse in fibromyalgia syndrome: A systematic review with meta-analysis. *Arthritis Care & Research*, 63(6), 808-820.  
doi:<https://dx.doi.org/10.1002/acr.20328>
- 18- Hemmingsson, E., Johansson, K., & Reynisdottir, S. (2014). Effects of childhood abuse on adult obesity: A systematic review and meta-analysis. *Obesity Reviews*, 15(11), 882-893. doi:<https://dx.doi.org/10.1111/obr.12216>
- 19- Huang, H., Yan, P., Shan, Z., Chen, S., Li, M., Luo, C., Liu, L. (2015). Adverse childhood experiences and risk of type 2 diabetes: A systematic review and meta-analysis. *Metabolism: Clinical & Experimental*, 64(11), 1408-1418.  
doi:<https://dx.doi.org/10.1016/j.metabol.2015.08.019>

- 20- Hugill, M., Berry, K., & Fletcher, I. (2017). The association between historical childhood sexual abuse and later parenting stress: A systematic review. *Archives of Women's Mental Health*, 20(2), 257-271. doi:<http://dx.doi.org/10.1007/s00737-016-0708-3>
- 21- Hutchens, B. F., Kearney, J., & Kennedy, H. P. (2017). Survivors of child maltreatment and postpartum depression: An integrative review. *Journal of Midwifery & Women's Health*, 62(6), 706-722. doi:<http://dx.doi.org/10.1111/jmwh.12680>
- 22- Ip, P., Wong, R. S., Li, S. L., Chan, K. L., Ho, F. K., & Chow, C. (2016). Mental health consequences of childhood physical abuse in chinese populations: A meta-analysis. *Trauma, Violence, & Abuse*, 17(5), 571-584.  
doi:<http://dx.doi.org/10.1177/1524838015585317>
- 23- Jespersen, A. F., Lalumiere, M. L., & Seto, M. C. (2009). Sexual abuse history among adult sex offenders and non-sex offenders: A meta-analysis. *Child Abuse & Neglect*, 33(3), 179-192. doi:<http://dx.doi.org/10.1016/j.chiabu.2008.07.004>
- 24- Khaleque, A. (2015). Perceived parental neglect, and children's psychological maladjustment, and negative personality dispositions: A meta-analysis of multi-cultural studies. *Journal of Child and Family Studies*, 24(5), 1419-1428.  
doi:<http://dx.doi.org/10.1007/s10826-014-9948-x>
- 25- Kimber, M., McTavish, J. R., Couturier, J., Boven, A., Gill, S., Dimitropoulos, G., & MacMillan, H. L. (2017). Consequences of child emotional abuse, emotional neglect and exposure to intimate partner violence for eating disorders: A systematic critical review. *BMC Psychology*, 5, Art 33-18. doi:<http://dx.doi.org/10.1186/s40359-017-0202-3>
- 26- Lang, J., McKie, J., Smith, H., McLaughlin, A., Gillberg, C., Shiels, P. G., & Minnis, H. (2019). Adverse childhood experiences, epigenetics and telomere length variation in

childhood and beyond: A systematic review of the literature. *European Child & Adolescent Psychiatry*, doi:<https://dx.doi.org/10.1007/s00787-019-01329-1>

27- Li, X., Wang, J., Zhou, J., Huang, P., & Li, J. (2017). The association between post-traumatic stress disorder and shorter telomere length: A systematic review and meta-analysis. *Journal of Affective Disorders*, *218*, 322-326.

doi:<http://dx.doi.org/10.1016/j.jad.2017.03.048>

28- Lindert, J., von Ehrenstein, O. S., Grashow, R., Gal, G., Braehler, E., & Weisskopf, M. G. (2014). Sexual and physical abuse in childhood is associated with depression and anxiety over the life course: Systematic review and meta-analysis. *International Journal of Public Health*, *59*(2), 359-372. doi:<http://dx.doi.org/10.1007/s00038-013-0519-5>

29- Liu, J., Fang, Y., Gong, J., Cui, X., Meng, T., Xiao, B., Luo, X. (2017). Associations between suicidal behavior and childhood abuse and neglect: A meta-analysis. *Journal of Affective Disorders*, *220*, 147-155. doi:<http://dx.doi.org/10.1016/j.jad.2017.03.060>

30- Lloyd, S., & Operario, D. (2012). HIV risk among men who have sex with men who have experienced childhood sexual abuse: Systematic review and meta-analysis. *AIDS Education and Prevention*, *24*(3), 228-241.

doi:<http://dx.doi.org/10.1521/aeap.2012.24.3.228>

31- Mandelli, L., Petrelli, C., & Serretti, A. (2015). The role of specific early trauma in adult depression: A meta-analysis of published literature. childhood trauma and adult depression. *European Psychiatry*, *30*(6), 665-680.

doi:<http://dx.doi.org/10.1016/j.eurpsy.2015.04.007>

- 32- Maniglio, R. (2013). Child sexual abuse in the etiology of anxiety disorders: A systematic review of reviews. *Trauma Violence & Abuse, 14*(2), 96-112.  
doi:<https://dx.doi.org/10.1177/1524838012470032>
- 33- Maniglio, R. (2013). The impact of child sexual abuse on the course of bipolar disorder: A systematic review. *Bipolar Disorders, 15*(4), 341-358.  
doi:<http://dx.doi.org/10.1111/bdi.12050>
- 34- Maniglio, R. (2015). Significance, nature, and direction of the association between child sexual abuse and conduct disorder: A systematic review. *Trauma Violence & Abuse, 16*(3), 241-257. doi:<https://dx.doi.org/10.1177/1524838014526068>
- 35- McTavish, J. R., Sverdlichenko, I., MacMillan, H. L., & Wekerle, C. (2019). Child sexual abuse, disclosure and PTSD: A systematic and critical review. *Child Abuse & Neglect, 92*, 196-208. doi:<https://dx.doi.org/10.1016/j.chiabu.2019.04.006>
- 36- Midei, A. J., & Matthews, K. A. (2011). Interpersonal violence in childhood as a risk factor for obesity: A systematic review of the literature and proposed pathways. *Obesity Reviews, 12*(5), e159-72. doi:<https://dx.doi.org/10.1111/j.1467-789X.2010.00823.x>
- 37- Molendijk, M. L., Hoek, H. W., Brewerton, T. D., & Elzinga, B. M. (2017). Childhood maltreatment and eating disorder pathology: A systematic review and dose-response meta-analysis. *Psychological Medicine, 47*(8), 1402-1416.  
doi:<http://dx.doi.org/10.1017/S0033291716003561>
- 38- Montgomery, E., Just-Ostergaard, E., & Jervelund, S. S. (2019). Transmitting trauma: A systematic review of the risk of child abuse perpetrated by parents exposed to traumatic events. *International Journal of Public Health, 64*(2), 241-251.  
doi:<https://dx.doi.org/10.1007/s00038-018-1185-4>

- 39- Nanni, V., Uher, R., & Danese, A. (2012). Childhood maltreatment predicts unfavorable course of illness and treatment outcome in depression: A meta-analysis. *The American Journal of Psychiatry*, *169*(2), 141-151.  
doi:<http://dx.doi.org/10.1176/appi.ajp.2011.11020335>
- 40- Naughton, A. M., Maguire, S. A., Mann, M. K., Lumb, R. C., Tempest, V., Gracias, S., & Kemp, A. M. (2013). Emotional, behavioral, and developmental features indicative of neglect or emotional abuse in preschool children: A systematic review. *JAMA Pediatrics*, *167*(8), 769-775. doi:<https://dx.doi.org/10.1001/jamapediatrics.2013.192>
- 41- Rafiq S., Campodonico C., & Varese, F. (2018). The relationship between childhood adversities and dissociation in severe mental illness: A meta-analytic review. *Acta Psychiatrica Scandinavica*, *138*(6), 509-525. doi:<http://dx.doi.org/10.1111/acps.12969>
- 42- Rhodes, A. E., Boyle, M. H., Tonmyr, L., Wekerle, C., Goodman, D., Leslie, B., Manion, I. (2011). Sex differences in childhood sexual abuse and suicide-related behaviors. *Suicide & Life-Threatening Behavior*, *41*(3), 235-254.  
doi:<https://dx.doi.org/10.1111/j.1943-278X.2011.00025.x>
- 43- Schneeberger, A. R., Dietl, M. F., Muenzenmaier, K. H., Huber, C. G., & Lang, U. E. (2014). Stressful childhood experiences and health outcomes in sexual minority populations: A systematic review. *Social Psychiatry & Psychiatric Epidemiology*, *49*(9), 1427-1445. doi:<https://dx.doi.org/10.1007/s00127-014-0854-8>
- 44- Sonneveld L.P., BrilleslijperKater S.N., Benninga M.A., Van Konijnenburg E.M.M.H., SieswerdaHoogendoorn T., & Teeuw, A. H. (2013). Prevalence of child sexual abuse in pediatric patients with chronic abdominal pain. *Journal of Pediatric Gastroenterology and Nutrition*, *56*(5), 475-480. doi:<http://dx.doi.org/10.1097/MPG.0b013e31828b5145>

- 45- Varese, F., Smeets, F., Drukker, M., Lieverse, R., Lataster, T., Viechtbauer, W., . . . Bentall, R. P. (2012). Childhood adversities increase the risk of psychosis: A meta-analysis of patient-control, prospective- and cross-sectional cohort studies. *Schizophrenia Bulletin*, 38(4), 661-671. doi:<http://dx.doi.org/10.1093/schbul/sbs050>
- 46- Viola, T. W., Salum, G. A., KluweSchiavon, B., SanvicenteVieira, B., Levandowski, M. L., & GrassiOliveira, R. (2016). The influence of geographical and economic factors in estimates of childhood abuse and neglect using the childhood trauma questionnaire: A worldwide meta-regression analysis. *Child Abuse & Neglect*, 51, 1-11. doi:<http://dx.doi.org/10.1016/j.chiabu.2015.11.019>
