# Supplementary material for: The hallmarks of childhood abuse and neglect: A systematic review
Source: PubMed Central journal article supplement (PMC7723263; doi:10.1371/journal.pone.0243639), 2020-12-08
Supplement: pone.0243639.s003.pdf [file pone.0243639.s003.pdf]

Detailed Search Terms:

Database: Ovid MEDLINE(R) ALL <1946 to May 28, 2019>

Search Strategy:

- 
- 1 Child Abuse/ (21075)
  - 2 Child Abuse, Sexual/ (9724)
  - 3 "Adult Survivors of Child Abuse"/ (1958)
  - 4 Adverse Childhood Experiences/ (163)
  - 5 ((child\* or early) adj3 (abuse\* or neglect\* or molest\* or maltreat\* or advers\* or stress\* or trauma\*)).tw. (51206)
  - 6 socioeconomic factors/ or economic status/ or poverty/ or poverty areas/ or social class/ or social mobility/ or cultural deprivation/ or public assistance/ or social security/ or aid to families with dependent children/ (217348)
  - 7 educational status/ or academic failure/ or literacy/ or employment/ or unemployment/ or family characteristics/ or marital status/ or divorce/ or marriage/ or single parent/ or widowhood/ or income/ (161031)
  - 8 gender identity/ or femininity/ or masculinity/ or men/ or women/ (33573)
  - 9 child, abandoned/ or child, adopted/ or "child of impaired parents"/ or child, foster/ or child, orphaned/ or child, unwanted/ or Disabled Children/ (12323)
  - 10 "sexual and gender minorities"/ or transgender persons/ or sexuality/ or bisexuality/ or homosexuality/ or homosexuality, female/ or homosexuality, male/ or transsexualism/ (39331)
  - 11 education/ or educational measurement/ or academic performance/ or academic success/ (56452)
  - 12 loneliness/ or love/ or Social Isolation/ (18597)
  - 13 exp Ethnic Groups/ or Minority Groups/ (152407)
  - 14 "Transients and Migrants"/ or human migration/ or "emigration and immigration"/ (33059)
  - 15 social environment/ or community networks/ or social support/ or psychosocial support systems/ (110511)
  - 16 residence characteristics/ or housing/ or public housing/ or social capital/ or Built Environment/ (48692)
  - 17 ((socioeconomic or socio economic) adj3 (factor\* or status)).tw. (54634)
  - 18 (poverty or poor or depriv\* or employ\* or income\*).tw. (1222744)

- 19 (gender or men or women or man or woman or girl\* or boy\* or disabilit\* or disabled or LGBT\* or lesbian\* or gay or bisexual\* or transgender or homosexual\* or transwomen or transwoman or transmen or transman or transpeople or transperson\*).tw. (2135667)
- 20 (educat\* or school\* or marital status or marriage or married or divorc\* or estranged or lonel\* or isolat\*).tw. (2037903)
- 21 ((romantic or intimate) adj3 (partner\* or relationship\*)).tw. (13705)
- 22 (ethnic\* or minorit\* or migrant\* or migration or immigrant\* or immigration).tw. (434435)
- 23 (neighbourhood\* or living conditions or housing).tw. (39129)
- 24 (social adj3 (capital or support or condition\*)).tw. (46605)
- 25 exp Genetics/ or exp Genetic Phenomena/ or Epigenomics/ or DNA Methylation/ or exp Biomarkers/ (4000199)
- 26 (gene or genetic\* or genotype\* or polymorphism or gene-environment interaction\* or epigen\* or DNA methylation or biochemical marker\* or biomarker\*).tw. (2535546)
- 27 exp Mental Disorders/ or exp Substance-Related Disorders/ or self-injurious behavior/ or self mutilation/ or suicide/ or suicidal ideation/ or suicide, attempted/ or exp Sleep Wake Disorders/ (1262823)
- 28 (depressi\* or panic or suicid\* or self harm\* or ((substance\* or drug\* or alcohol) adj3 (misus\* or abus\* or disorder\*)) or sleep disturbance\* or sleep disorder\* or PTSD or CPTSD or mood disorder\* or anxiety or agoraphobia or GAD or oppositional defiant disorder or conduct disorder\* or eating disorder\* or bipolar).tw. (683691)
- 29 exp Obesity/ or exp Smoking/ or exp Pulmonary Disease, Chronic Obstructive/ or exp Heart Diseases/ or exp Gastrointestinal Diseases/ or exp Diabetes Mellitus/ or exp Kidney Diseases/ (3076970)
- 30 (obese or obesity or smoking or smoker\* or COPD or heart disease\* or gastro-intestinal disorder\* or diabet\* or renal disease\*).tw. (1176498)
- 31 exp Autonomic Nervous System/ or exp Arrhythmia, Sinus/ or Heart Rate/ or Galvanic Skin Response/ (288073)
- 32 (((stress or cardiovascular) adj (respons\* or react\*)) or autonomic nervous system or heart rate varia\* or sinus arrhythmia or pre-ejection period or heart rate or vagal or sympathetic or parasympathetic or skin conductance or galvanic skin response or GSR or SCL or SCR).tw. (313430)
- 33 exp Neuroimaging/ or exp Magnetic Resonance Imaging/ (524046)
- 34 ((Brain adj3 imag\*) or magnetic resonance imaging or MRI or fMRI or neuroimaging).tw. (391863)
- 35 exp Hydrocortisone/ or exp Inflammation/ or exp Immune System/ or exp Cytokines/ or C-Reactive Protein/ or exp Acute-Phase Proteins/ or exp NF-kappa B/ or exp Interleukins/ or

exp Fibrinogen/ or exp Leukocytes/ or exp Lymphocytes/ or Tumor Necrosis Factor-alpha/  
(1955356)

36 (cortisol or HPA axis or hypothalamic pituitary adrenal axis or Inflammation or  
Immune System or Cytokine\* or C-Reactive Protein or Acute Phase Proteins or NF-kappa B  
or Interleukins or Fibrinogen or White Blood Cell\* or White Cell\* or Leukocyte\* or  
Lymphocyte\* or TNF-alpha).tw. (1276847)

37 1 or 2 or 3 or 4 or 5 (63482)

38 6 or 7 or 8 or 9 or 10 or 11 or 12 or 13 or 14 or 15 or 16 or 17 or 18 or 19 or 20 or 21 or  
22 or 23 or 24 (5501977)

39 25 or 26 (4809139)

40 27 or 28 (1624523)

41 29 or 30 (3488788)

42 31 or 32 (469343)

43 33 or 34 (670417)

44 35 or 36 (2459967)

45 38 or 39 or 40 or 41 or 42 or 43 or 44 (14271959)

46 37 and 45 (44465)

47 limit 46 to english language (41662)

48 (MEDLINE or systematic review).tw. or meta analysis.pt. (241425)

49 47 and 48 (897)

50 limit 49 to yr="2009 -Current" (732)

\*\*\*\*\*
