# Supplementary material for: The hallmarks of childhood abuse and neglect: A systematic review
Source: PubMed Central journal article supplement (PMC7723263; doi:10.1371/journal.pone.0243639), 2020-12-08
Supplement: pone.0243639.s005.pdf [file pone.0243639.s005.pdf]

# PLOS ONE

## The hallmarks of childhood abuse and neglect: a systematic review

--Manuscript Draft--

|                                             |                                                                                                                                                                                                                                                                                                                                                                                                                                                                                                                                                                                                                                                                                                                                                                                                                                                                                                                                                                                                                                                                                                                                                                                                                                                                                                                                                                                                                                                                                                                                                                                                                                                                                                                                               |
|---------------------------------------------|-----------------------------------------------------------------------------------------------------------------------------------------------------------------------------------------------------------------------------------------------------------------------------------------------------------------------------------------------------------------------------------------------------------------------------------------------------------------------------------------------------------------------------------------------------------------------------------------------------------------------------------------------------------------------------------------------------------------------------------------------------------------------------------------------------------------------------------------------------------------------------------------------------------------------------------------------------------------------------------------------------------------------------------------------------------------------------------------------------------------------------------------------------------------------------------------------------------------------------------------------------------------------------------------------------------------------------------------------------------------------------------------------------------------------------------------------------------------------------------------------------------------------------------------------------------------------------------------------------------------------------------------------------------------------------------------------------------------------------------------------|
| <b>Manuscript Number:</b>                   | PONE-D-20-08783                                                                                                                                                                                                                                                                                                                                                                                                                                                                                                                                                                                                                                                                                                                                                                                                                                                                                                                                                                                                                                                                                                                                                                                                                                                                                                                                                                                                                                                                                                                                                                                                                                                                                                                               |
| <b>Article Type:</b>                        | Research Article                                                                                                                                                                                                                                                                                                                                                                                                                                                                                                                                                                                                                                                                                                                                                                                                                                                                                                                                                                                                                                                                                                                                                                                                                                                                                                                                                                                                                                                                                                                                                                                                                                                                                                                              |
| <b>Full Title:</b>                          | The hallmarks of childhood abuse and neglect: a systematic review                                                                                                                                                                                                                                                                                                                                                                                                                                                                                                                                                                                                                                                                                                                                                                                                                                                                                                                                                                                                                                                                                                                                                                                                                                                                                                                                                                                                                                                                                                                                                                                                                                                                             |
| <b>Short Title:</b>                         | The hallmarks of childhood abuse and neglect                                                                                                                                                                                                                                                                                                                                                                                                                                                                                                                                                                                                                                                                                                                                                                                                                                                                                                                                                                                                                                                                                                                                                                                                                                                                                                                                                                                                                                                                                                                                                                                                                                                                                                  |
| <b>Corresponding Author:</b>                | Daniel Kerr, MBChB, MRCPsych<br>University of Glasgow School of Medicine Dentistry and Nursing<br>Glasgow, UNITED KINGDOM                                                                                                                                                                                                                                                                                                                                                                                                                                                                                                                                                                                                                                                                                                                                                                                                                                                                                                                                                                                                                                                                                                                                                                                                                                                                                                                                                                                                                                                                                                                                                                                                                     |
| <b>Keywords:</b>                            | Child Abuse; Child Neglect; Risk Factors; Outcomes; Hallmarks                                                                                                                                                                                                                                                                                                                                                                                                                                                                                                                                                                                                                                                                                                                                                                                                                                                                                                                                                                                                                                                                                                                                                                                                                                                                                                                                                                                                                                                                                                                                                                                                                                                                                 |
| <b>Abstract:</b>                            | <p><b>Background :</b> Studies on the impacts of childhood abuse and neglect have been conducted in diverse areas. Mechanistic understanding of the complex interplay between factors is lacking. Hallmarking is an approach which identifies common factors across studies and highlights the most robust findings.</p> <p><b>Objectives:</b> In a review of systematic reviews and meta-analyses, we addressed the following questions: 1) What are the hallmarks of exposure to childhood abuse and neglect across the bio-ecological spectrum? 2) What is the strength of evidence to support each hallmark? 3) What are the gaps that future research should address?</p> <p><b>Methods:</b> A comprehensive literature search was carried out to find relevant systematic reviews or meta-analyses. 269 articles were read in full and 178 articles, encompassing more than 6000 original papers, were included in the final synthesis. All reviews were independently rated for quality by at least 2 reviewers.</p> <p><b>Results:</b> Of 178 review articles, 6 were rated as high quality (all meta-analyses) and 46 were rated as medium quality. Based on the most commonly reported high quality findings we propose that the hallmarks of child abuse and neglect are: Increased risk of psychopathology; Increased risk of obesity; Increased risk of high- risk sexual behaviours , Increased risk of smoking, and Increased risk of abuse and neglect in children with disabilities.</p> <p><b>Conclusions:</b> Hallmarks of child abuse and neglect were identified. Research gaps include a lack of focus on complexity and resilience. Adequately powered prospective studies are required to move the field forward.</p> |
| <b>Order of Authors:</b>                    | <p>Jason Lang</p> <p>Daniel Michael Kerr, MBChB, MRCPsych</p> <p>Papoula Petri</p> <p>Tracey McKee</p> <p>Helen Smith</p> <p>Naomi Wilson</p> <p>Marianna Zavrou</p> <p>Paul Shiels</p> <p>Helen Minnis</p>                                                                                                                                                                                                                                                                                                                                                                                                                                                                                                                                                                                                                                                                                                                                                                                                                                                                                                                                                                                                                                                                                                                                                                                                                                                                                                                                                                                                                                                                                                                                   |
| <b>Additional Information:</b>              |                                                                                                                                                                                                                                                                                                                                                                                                                                                                                                                                                                                                                                                                                                                                                                                                                                                                                                                                                                                                                                                                                                                                                                                                                                                                                                                                                                                                                                                                                                                                                                                                                                                                                                                                               |
| <b>Question</b>                             | <b>Response</b>                                                                                                                                                                                                                                                                                                                                                                                                                                                                                                                                                                                                                                                                                                                                                                                                                                                                                                                                                                                                                                                                                                                                                                                                                                                                                                                                                                                                                                                                                                                                                                                                                                                                                                                               |
| <b>Financial Disclosure</b>                 | The authors received no specific funding for this work.                                                                                                                                                                                                                                                                                                                                                                                                                                                                                                                                                                                                                                                                                                                                                                                                                                                                                                                                                                                                                                                                                                                                                                                                                                                                                                                                                                                                                                                                                                                                                                                                                                                                                       |
| Enter a financial disclosure statement that |                                                                                                                                                                                                                                                                                                                                                                                                                                                                                                                                                                                                                                                                                                                                                                                                                                                                                                                                                                                                                                                                                                                                                                                                                                                                                                                                                                                                                                                                                                                                                                                                                                                                                                                                               |

describes the sources of funding for the work included in this submission. Review the [submission guidelines](#) for detailed requirements. View published research articles from [PLOS ONE](#) for specific examples.

This statement is required for submission and **will appear in the published article** if the submission is accepted. Please make sure it is accurate.

#### Unfunded studies

Enter: *The author(s) received no specific funding for this work.*

#### Funded studies

Enter a statement with the following details:

- Initials of the authors who received each award
- Grant numbers awarded to each author
- The full name of each funder
- URL of each funder website
- Did the sponsors or funders play any role in the study design, data collection and analysis, decision to publish, or preparation of the manuscript?
- **NO** - Include this sentence at the end of your statement: *The funders had no role in study design, data collection and analysis, decision to publish, or preparation of the manuscript.*
- **YES** - Specify the role(s) played.

\* typeset

#### Competing Interests

Use the instructions below to enter a competing interest statement for this submission. On behalf of all authors, disclose any [competing interests](#) that could be perceived to bias this work—acknowledging all financial support and any other relevant financial or non-financial competing interests.

This statement **will appear in the published article** if the submission is accepted. Please make sure it is accurate. View published research articles from [PLOS ONE](#) for specific examples.

The authors have declared no competing interests exist.

**NO authors have competing interests**

Enter: *The authors have declared that no competing interests exist.*

**Authors with competing interests**

Enter competing interest details beginning with this statement:

*I have read the journal's policy and the authors of this manuscript have the following competing interests: [insert competing interests here]*

\* typeset

**Ethics Statement**

N/A

Enter an ethics statement for this submission. This statement is required if the study involved:

- Human participants
- Human specimens or tissue
- Vertebrate animals or cephalopods
- Vertebrate embryos or tissues
- Field research

Write "N/A" if the submission does not require an ethics statement.

General guidance is provided below. Consult the [submission guidelines](#) for detailed instructions. **Make sure that all information entered here is included in the Methods section of the manuscript.**

**Format for specific study types**

**Human Subject Research (involving human participants and/or tissue)**

- Give the name of the institutional review board or ethics committee that approved the study
- Include the approval number and/or a statement indicating approval of this research
- Indicate the form of consent obtained (written/oral) or the reason that consent was not obtained (e.g. the data were analyzed anonymously)

**Animal Research (involving vertebrate animals, embryos or tissues)**

- Provide the name of the Institutional Animal Care and Use Committee (IACUC) or other relevant ethics board that reviewed the study protocol, and indicate whether they approved this research or granted a formal waiver of ethical approval
- Include an approval number if one was obtained
- If the study involved *non-human primates*, add *additional details* about animal welfare and steps taken to ameliorate suffering
- If anesthesia, euthanasia, or any kind of animal sacrifice is part of the study, include briefly which substances and/or methods were applied

**Field Research**

Include the following details if this study involves the collection of plant, animal, or other materials from a natural setting:

- Field permit number
- Name of the institution or relevant body that granted permission

**Data Availability**

Authors are required to make all data underlying the findings described fully available, without restriction, and from the time of publication. PLOS allows rare exceptions to address legal and ethical concerns. See the [PLOS Data Policy](#) and [FAQ](#) for detailed information.

Yes - all data are fully available without restriction

A Data Availability Statement describing where the data can be found is required at submission. Your answers to this question constitute the Data Availability Statement and **will be published in the article**, if accepted.

**Important:** Stating 'data available on request from the author' is not sufficient. If your data are only available upon request, select 'No' for the first question and explain your exceptional situation in the text box.

Do the authors confirm that all data underlying the findings described in their manuscript are fully available without restriction?

**Describe where the data may be found in full sentences. If you are copying our sample text, replace any instances of XXX with the appropriate details.**

- If the data are **held or will be held in a public repository**, include URLs, accession numbers or DOIs. If this information will only be available after acceptance, indicate this by ticking the box below. For example: *All XXX files are available from the XXX database (accession number(s) XXX, XXX).*
- If the data are all contained **within the manuscript and/or Supporting Information files**, enter the following: *All relevant data are within the manuscript and its Supporting Information files.*
- If neither of these applies but you are able to provide **details of access elsewhere**, with or without limitations, please do so. For example:

*Data cannot be shared publicly because of [XXX]. Data are available from the XXX Institutional Data Access / Ethics Committee (contact via XXX) for researchers who meet the criteria for access to confidential data.*

*The data underlying the results presented in the study are available from (include the name of the third party*

All relevant data are within the manuscript and its Supporting Information files.

*and contact information or URL).*

- This text is appropriate if the data are owned by a third party and authors do not have permission to share the data.

\* typeset

Additional data availability information:

1 The hallmarks of childhood abuse and neglect: a systematic review

2 Jason Lang<sup>1,2</sup>, Daniel M Kerr<sup>1\*</sup>, Papoula Petri<sup>1</sup>, Tracey McKee<sup>3</sup>, Helen Smith<sup>3</sup>, Naomi  
3 Wilson<sup>3</sup>, Marianna Zavrou<sup>3</sup>, Paul Shiels<sup>1¶</sup>, Helen Minnis<sup>1¶</sup>

4

5 1- University of Glasgow. Glasgow. United Kingdom.

6 2- NHS Lanarkshire. Lanarkshire. United Kingdom

7 3- NHS Greater Glasgow and Clyde. Glasgow. United Kingdom.

8

9

10 ¶- These authors contributed equally to the work

11 \*Corresponding Author

12 [Daniel.Kerr@glasgow.ac.uk](mailto:Daniel.Kerr@glasgow.ac.uk) (DMK)

13

14 **Declarations of Interests:** None

15 **Funding:** This research did not receive any specific grant from funding agencies in the  
16 public, commercial, or not-for-profit sectors

17

## 18 **Abstract**

19 **Background:** Studies on the impacts of childhood abuse and neglect have been conducted in  
20 diverse areas. Mechanistic understanding of the complex interplay between factors is lacking.  
21 Hallmarking is an approach which identifies common factors across studies and highlights  
22 the most robust findings.

23 **Objectives:** In a review of systematic reviews and meta-analyses, we addressed the following  
24 questions: 1) What are the hallmarks of exposure to childhood abuse and neglect across the  
25 bio-ecological spectrum? 2) What is the strength of evidence to support each hallmark? 3)  
26 What are the gaps that future research should address?

27 **Methods:** A comprehensive literature search was carried out to find relevant systematic  
28 reviews or meta-analyses. 269 articles were read in full and 178 articles, encompassing more  
29 than 6000 original papers, were included in the final synthesis. All reviews were  
30 independently rated for quality by at least 2 reviewers.

31 **Results:** Of 178 review articles, 6 were rated as high quality (all meta-analyses) and 46 were  
32 rated as medium quality. Based on the most commonly reported high quality findings we  
33 propose that the hallmarks of child abuse and neglect are: *Increased risk of psychopathology;*  
34 *Increased risk of obesity; Increased risk of high- risk sexual behaviours, Increased risk of*  
35 *smoking, and Increased risk of abuse and neglect in children with disabilities.*

36 **Conclusions:** Hallmarks of child abuse and neglect were identified. Research gaps include a  
37 lack of focus on complexity and resilience. Adequately powered prospective studies are  
38 required to move the field forward.

39

40



## 41 **Introduction**

42 In the two decades since the seminal publication of the CDC/Kaiser Permanente Adverse  
43 Childhood Experiences (ACE) Study [1], there has been a growing interest in the long term  
44 effects of exposure to childhood abuse and neglect and the long-term impact such exposure  
45 may confer on individuals so exposed. ACE exposure and its association with impaired  
46 biological and psychosocial functioning, has found traction in both the popular press and with  
47 governments around the world [2, 3].

48 The history of the development of this literature has been summarised by several authors in  
49 the field [4, 5]. Certain recurrent findings have been noted in the literature in relation to  
50 associations between exposure to child abuse and neglect and the development of physical,  
51 psychological, and social problems in adulthood [4, 5]. This literature has become  
52 increasingly broad as additional concepts have been discovered and documented. An  
53 example of this is in the area of epigenetics where there have been increasing numbers of  
54 papers published in the scientific literature from multiple centres looking at possible  
55 associations between such exposure and changes in the epigenome [6]. Despite the volume  
56 of such work, there are still unanswered questions about child abuse and neglect and health  
57 and psychosocial outcomes. For example, in abused and neglected individuals, what are the  
58 associations between biological factors (e.g. epigenetic modifications of DNA) and  
59 psychological factors (e.g. suicidality)? What is the impact of the social world of the child on  
60 risk and resilience in the context of abuse and neglect? At which developmental periods are  
61 abuse and neglect most likely to increase risk of negative mental and physical health  
62 outcomes? What is the impact of different forms of abuse at different critical periods in  
63 development? Does this differ by gender?

64 Additionally, there continues to be issues with the quality of some work in the area. For  
65 example, much work is based on retrospective reports of ACE exposure from adults with a

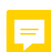

66 relative paucity of high quality longitudinal prospective studies beginning in childhood [5, 6].  
67 This is particularly concerning since there is poor agreement between retrospective and  
68 prospective reports of abuse and neglect [7].

69 Given the ~~apparent~~ complexity in relationships between potential causes, confounders, and  
70 outcomes of exposure to abuse and neglect, ~~it would be helpful~~ to consider the full spectrum  
71 of influences and exposures which a child may experience, in addition to abuse and neglect,  
72 as well as the interplay between biological and social factors, in order to develop a coherent  
73 model that is informative about mechanisms. This model may allow us to understand the  
74 relationship between the development of subsequent physical, psychological, and social  
75 manifestations of abuse and neglect and, perhaps more importantly, understand why some  
76 children seem to be protected from such negative outcomes. In this developing area of  
77 understanding, it is likely that interdependent processes will interact at multiple levels: from  
78 genetics, through the stress and immune systems, the brain, and into the family and wider  
79 community, with the potential for reciprocal influences and bidirectional causality at all  
80 levels [8].

81 Due to the increasing diversity of outcomes under examination, and the wide range of quality  
82 in the published literature, it has become important to find a way to better conceptualise and  
83 integrate this broad evidence base. This will enable researchers to better understand what  
84 evidence can be relied upon, and therefore what is known about the likely causes and  
85 outcomes of childhood abuse and neglect, how these might interact, and what this tells us  
86 about likely mechanisms. This is where the concept of “hallmarking” might be useful. The  
87 hallmarking technique was first applied to cancer studies, at a time when this literature was  
88 also experiencing a significant growth in volume and complexity [9]. The purpose of  
89 hallmarking is to find common factors by seeking commonalities across different studies and  
90 in most (if not all) types of cancer.

91 Applying this concept to the study of childhood abuse and neglect, we wanted to identify  
92 hallmarks across the entire biopsychosocial environment of the child and to consider the  
93 volume and quality of evidence for each of these. Recent theoretical models have focussed  
94 on the human stress response system as the “control centre” for human adaptation to severe  
95 stresses such as abuse and neglect. These suggest that only a truly integrated approach that  
96 involves all bio-ecological levels has the potential to identify mechanisms [10] . Some  
97 hallmarking processes have examined commonalities across both humans and other species  
98 [9, 11, 12] but we did not think that was appropriate here: whilst there are animal models of  
99 early life stress, we chose to look more specifically at abuse and neglect as opposed to early  
100 life stress more broadly. Animal models cannot distinguish these.

101 Many thousands of papers have been written about factors associated with child abuse and  
102 neglect and many literature reviews have been conducted exploring these. In order to bring  
103 together such a large body of literature, we have conducted a ‘review of reviews’ [13] as the  
104 first stage of our hallmarking process, followed by a synthesis of the findings of these with  
105 reference to the bio-ecological model. We aimed to answer the following questions:

- 106 1. What are the hallmarks of exposure to childhood abuse and neglect across the bio-  
107 ecological spectrum?
- 108 2. What is the strength of evidence to support each hallmark so identified?
- 109 3. What are the research gaps in this field, in terms of areas where further research or  
110 better quality research is needed?

## 111 **Methods**

112 The systematic review was performed in accordance with PRISMA, PRIMSA checklist is  
113 available in supplementary materials (S1). Studies were identified by searching the following  
114 electronic databases from 2009 to present: Ovid Medline ALL (R) (1946 to Present), OVID

115 Embase Classic & Embase (1947 to Present), OVID PsycInfo (1806 to Present) and the  
116 Cochrane Database of Systematic Reviews. All searches were run on 29<sup>th</sup> May 2019.

117 The search strategy was developed by a Subject Specialist Librarian in consultation with the  
118 review group. The final draft Medline search strategy was peer reviewed by another librarian  
119 not involved in the review. The search strategy utilised a combination of subject headings and  
120 keywords; the strategy was adapted to each database as required to take account of  
121 differences in subject headings and search tools. Due to time constraints a systematic review  
122 search filter was applied to the search strategy to maximise specificity. The search filters  
123 were developed by the Health Information Research Unit at McMaster University, Canada  
124 [14-16]. In addition, the results were limited to English Language and, because we wanted to  
125 focus on the recent literature, more likely to evidence current theoretical models, a  
126 publication date limit was set of within the last ten years (2009 to May 2019). The master  
127 search strategy for OVID Medline ALL (R) can be found in the supplementary material (S2).

128 The search strategy consisted of eight individual concepts drawn from the review question;  
129 these were searched individually and then combined to find relevant studies. The first search  
130 concept was ‘child abuse & neglect’ and the search terms included child abuse, childhood  
131 sexual abuse, child neglect and adverse childhood experiences. The second search concept  
132 was ‘social factors’, the search terms included socioeconomic factors, poverty, gender,  
133 sexuality, educational status and social support. The third search concept was ‘genetic  
134 phenomena’ and the search terms included genetics, epigenetics and biomarkers. The fourth  
135 concept was ‘mental health’, search terms included mental disorders, suicide, depression and  
136 PTSD. The fifth concept was ‘physical health’ and the search terms included obesity,  
137 smoking, heart disease and diabetes. The sixth search concept was ‘stress responsivity’; the  
138 search terms included autonomic nervous system, stress response and heart rate. The seventh  
139 search concept was ‘neuro-anatomical factors’, the search terms include neuroimaging and

140 MRI. The final search concept was ‘inflammatory/endocrine markers’, the search terms  
141 included endocrine and immune biomarkers.

142 The PRISMA flow diagram [17] is shown in Figure 1. The total number of articles returned  
143 from the original search was 2255 and following removal of duplicates 1433 articles  
144 remained. 1433 records underwent title and abstract review for inclusion using inclusion /  
145 exclusion criteria agreed prior to the search process by at least 2 raters (see figure 2 for  
146 inclusion / exclusion criteria). Where conflict existed, this was resolved in a conference of  
147 the authors. Following this process, 269 articles were read in full by at least two reviewers.  
148 A further 90 records did not meet inclusion criteria when read in full and were excluded  
149 (reasons in Figure 1). All exclusions were checked and agreed by at least two authors. This  
150 left 178 articles which were data extracted and rated for quality using the AMSTAR checklist  
151 [18]. All articles were independently rated by at least two authors and discrepancies resolved  
152 at conference. Data on study setting, type of abuse, number of studies, and results were  
153 extracted.

154 **Figure 1 PRISMA Flow Diagram**

155 **Figure 2 Inclusion and Exclusion Criteria**

156 We considered quantitative analysis using a network approach but this was not possible due  
157 to the wide range of variables examined in the reviews. Instead results are presented in  
158 narrative format.

## 159 **Results**

### 160 **Characteristics of studies**

161 One hundred and seventy nine studies were included. 43% of these studies were meta-  
162 analyses (n=77) and 57% were systematic reviews (n=102).

163 The review included studies from North America, Europe, South America, Asia, Africa and  
164 Australasia, see Figure 3.

165 **Figure 3. Country of origin of studies included in reviews. (Details available on request)**

166 Not all studies identified the sources of the studies (n=15), and many reviews and meta-  
167 analyses included studies from more than one country. Some studies used phases such as  
168 ‘non-US high income countries’ or ‘industrialised countries’, others grouped countries by  
169 continent, albeit not consistently.

170 Overall, we identified 4 broad categories: *Mind & Body*, *Genes & Epigenetic factors*, *Social*  
171 *Factors*, and *Biochemical Factors*. The distribution of papers by category is shown in **Table**

172 **1.**

173 **Table 1. Types and numbers of papers sorted by thematic category and subthemes.**

| CATEGORY                             | SUBTHEME | BIO-<br>ECOLOGICAL<br>LEVELS | NUMBER<br>OF PAPERS |
|--------------------------------------|----------|------------------------------|---------------------|
| • BIOCHEMICAL<br>FACTORS             |          | Microsystem                  | 7                   |
| • GENES AND<br>EPIGENETIC<br>FACTORS |          | Microsystem                  | 11                  |
| • MIND AND<br>BODY                   |          |                              |                     |

- **SOCIAL FACTORS**

|                                                              |                            |    |
|--------------------------------------------------------------|----------------------------|----|
| Individual mental Health, substance use and misuse           | Microsystem                | 74 |
| Brain structure, neurodevelopment, cognition and personality | Microsystem                | 18 |
| Physical health                                              | Microsystem                | 17 |
| Environmental risk factors                                   | Exo- & Macrosystem         | 18 |
| Offending and antisocial behaviour                           | Meso- , Exo- & Macrosystem | 10 |
| Relationships, parenting, sexual behaviour                   | Mesosystem                 | 16 |
| Education/adults economic status                             | Meso- , Exo- & Macrosystem | 2  |
| Resilience factors                                           | All systems                | 6  |

174

175 ‘*Biochemical factors*’ included studies of markers of inflammation, the immune system,  
 176 cortisol and other biomarkers. ‘*Genes and Epigenetic factors*’ looked at genetic and  
 177 epigenetic markers. Due the number of papers in the categories ‘*Body and Mind*’ and ‘*Social*  
 178 ‘*Factors*’, these were further divided into subthemes. *Body and Mind*: Mental Health and

179 Substance Use/Misuse'; 'Physical Health; 'Brain structure, neurodevelopment, cognition and  
180 personality'; '*Social Factors*': 'Relationships, parenting, sexual behaviour' and 'Offending  
181 and antisocial behaviour'.

182 One hundred and forty-two studies (79%) investigated a combination of types of abuse and  
183 neglect, whereas thirty-three (18%) concentrated on sexual abuse, two (1%) on physical  
184 abuse and three (2%) on emotional abuse. The modal number of included studies per review  
185 was 12 (range 2-393).

## 186 **Quality of the Studies**

187 Overall, over two thirds (70%, n=126) of papers were rated as low or critically low quality.  
188 Just over a quarter (27%, n=46) were rated as moderate quality and only 3% (n=6) were rated  
189 as high quality (see figure 6). Most lower ratings could be explained by the lack of a 'risk of  
190 bias assessment' or a failure to incorporate such an assessment into the synthesis. Further,  
191 many papers lacked a rigorous search strategy and data extraction procedure.

192 To achieve a high-quality rating according to the AMSTAR rating scale, a paper needed to  
193 complete the search and data extraction in duplicate, i.e. by two independent authors, and  
194 have a rigorous 'risk of bias assessment' examining factors such as representativeness of the  
195 sample, loss to follow up etc. It also needed to investigate heterogeneity of outcome measures  
196 and publication bias.

197 No systematic reviews achieved high quality rating, however 6 meta-analyses did. Figure 3  
198 shows the quality rating of articles by review type and thematic category.

199 **Figure 3 Overview of AMSTAR ratings by type of review and theme**



200 **Findings of high-quality studies**

201 Six papers received a high-quality AMSTAR rating. All were meta-analyses. 5 of these  
202 papers fell into the thematic category of Mind and Body and one into the category of Social  
203 Factors. Of the five papers in the Mind and Body category, four had the subtheme of ‘mental  
204 health and substance use’. All of these papers investigated more than one type of abuse.  
205 Details of these papers are summarised in Table 2.

206 **Table 2.**

| Author   | Year | Category    | AMSTAR score | Type of abuse investigated                                                         | Number of included studies | Number of participants in meta-analysis | Countries of studies | Summary of result                                                                                                                                                                                                                                                                                                                                   |
|----------|------|-------------|--------------|------------------------------------------------------------------------------------|----------------------------|-----------------------------------------|----------------------|-----------------------------------------------------------------------------------------------------------------------------------------------------------------------------------------------------------------------------------------------------------------------------------------------------------------------------------------------------|
| Bailey T | 2018 | Body & Mind | High         | Sexual abuse, physical abuse, emotional abuse, physical neglect, emotional neglect | 41(29)                     | 4680                                    | Not stated           | <ul style="list-style-type: none"> <li>• Sexual abuse and neglect affect severity of hallucination</li> <li>• Sexual abuse, physical neglect, and emotional neglect are associated with delusion severity</li> <li>• Sexual abuse affected severity of positive symptoms</li> <li>• Emotional neglect and physical neglect are associate</li> </ul> |

---

|               |      |             |      |                    |    |            |                                                                                          |                                                                                                          |
|---------------|------|-------------|------|--------------------|----|------------|------------------------------------------------------------------------------------------|----------------------------------------------------------------------------------------------------------|
|               |      |             |      |                    |    |            |                                                                                          | with severity of negative symptoms                                                                       |
| Castellvi, P. | 2017 | Body & Mind | High | Child maltreatment | 26 | 143,730    | Netherland, New Zealand, United States, Norway, Canada, United Kingdom, Denmark, Finland | <ul style="list-style-type: none"> <li>Physical abuse increases risk of suicidal behaviour</li> </ul>    |
| Fusar-Poli, P | 2017 | Body & Mind | High | Childhood abuse,   | 44 | Not stated | Not stated                                                                               | <ul style="list-style-type: none"> <li>Ultra-high risk state for psychosis is associated with</li> </ul> |

|             |      |             |      |                                                                                           |     |            |                                                               |                                                                                                                                                                      |
|-------------|------|-------------|------|-------------------------------------------------------------------------------------------|-----|------------|---------------------------------------------------------------|----------------------------------------------------------------------------------------------------------------------------------------------------------------------|
|             |      |             |      | childhood neglect                                                                         |     |            |                                                               | physical neglect, and emotional abuse                                                                                                                                |
| Jones, L    | 2012 | Body & Mind | High | physical violence, sexual violence, emotional abuse, neglect and any combination of those | 17  | 18,374     | United States, United kingdom, Sweden, Finland, Spain, Israel | <ul style="list-style-type: none"> <li>Children with disabilities are at higher risk of physical, emotional and sexual abuse, and neglect.</li> </ul>                |
| Normal, R.E | 2012 | Body & Mind | High | Physical abuse, Emotional                                                                 | 124 | Not stated | Australia, New Zealand, Western                               | <ul style="list-style-type: none"> <li>Physical abuse, and emotional abuse increases risk for depressive disorder, anxiety disorders and eating disorders</li> </ul> |

abuse,  
neglect

Europe,  
North  
America

- Physical abuse, and neglect doubled odds of childhood behaviour and conduct disorder
- Physical abuse, and neglect increased risk of alcohol misuse and dependence
- Physical abuse, emotional abuse, and neglect increased risk of suicidal behaviour
- Physical abuse, emotional abuse, and neglect were associated with increased risk of STI (including HIV) and increased risky sexual behaviour

|            |      |                |      |                |     |         |                                                                                   |                                                                                                                                                                                                                                         |
|------------|------|----------------|------|----------------|-----|---------|-----------------------------------------------------------------------------------|-----------------------------------------------------------------------------------------------------------------------------------------------------------------------------------------------------------------------------------------|
| Winokur M. | 2014 | Social Factors | High | Abuse, Neglect | 102 | 666,615 | United States, Spain, Norway, Ireland, Israel, Sweden, the Netherlands, Australia | <ul style="list-style-type: none"> <li>Physical abuse, emotional abuse, and neglect increased the risk of smoking and being obese</li> <li>Kinship care mediates the relationships between childhood abuse and mental health</li> </ul> |
|------------|------|----------------|------|----------------|-----|---------|-----------------------------------------------------------------------------------|-----------------------------------------------------------------------------------------------------------------------------------------------------------------------------------------------------------------------------------------|

208 Fusar-Poli et al. [19] performed a systematic review and meta-analysis of environmental  
209 factors associated with ultra-high risk for psychosis, including childhood abuse and neglect.  
210 Forty-four studies were included in their review. This review only included papers written in  
211 English and did not report the origin of original studies. They found strong evidence that  
212 emotional abuse (OR=5.843, 95% CI 1.794-19.027) and physical neglect (OR=3.066, 95% CI  
213 1.043-9.013) experienced during childhood are associated with ultra-high-risk state for  
214 psychosis;

215 Bailey et al. [20] studied the association between childhood trauma and severity of  
216 hallucinations and delusions in psychotic disorders. Their review included 41 studies, of  
217 which 29 were included in the meta-analysis with 4680 participants in total. This review  
218 defined childhood trauma to include sexual abuse, physical abuse, emotional abuse, physical  
219 neglect, emotional neglect, and bullying. The countries of origin of the included studies were  
220 not stated, however only studies published in English were included. They found that  
221 childhood sexual abuse and neglect was significantly correlated with severity of  
222 hallucinations ( $r=.172$ ,  $p<0.001$ ). Sexual abuse and physical or emotional neglect was also  
223 associated with delusion severity ( $r=.199$ ,  $p<0.001$ ). Further, sexual abuse increased severity  
224 of positive symptoms and negative symptoms of schizophrenia were associated with  
225 childhood neglect.

226 Castellvi et al. [21] investigated the association between exposure to violence and risk for  
227 suicide. The meta-analysis included 26 papers with a total sample of 143,730. Violence was  
228 defined as child maltreatment, bullying, dating violence and community violence. The  
229 included studies originated in the Netherland, New Zealand, United States, Norway, Canada,  
230 United Kingdom, Denmark, Finland. They found participants with experience of physical  
231 abuse to have an increased risk of suicidal behaviour (OR=2.25; 95% CI: 1.85-2.73). The  
232 evidence was weaker for the association between sexual abuse and suicide behaviour. There

233 were not enough studies that investigated the link between emotional abuse and suicide  
234 behaviour. The association between neglect and suicide behaviour was not significant.

235 Norman et al. [22] investigated a range of associations with health outcomes and physical  
236 abuse, emotional abuse and neglect. These consequences were not limited to mental health,  
237 and included HIV risk and obesity. However, most included papers were about mental health  
238 and substance use. The studies included in this review originated in Australia, New Zealand,  
239 Western Europe and North America. They found that adults who were physically abused (  
240 OR=1.54, 95% CI 1.16-2.04), emotionally abused (OR=3.06, 95% 2.43-3.85) or neglected  
241 (OR=2.11, 95% CI 1.61-2.77) were at higher risk of developing depressive disorders, anxiety  
242 disorders and eating disorders. The association between depression and physical abuse was  
243 only significant in high-income countries and not in low- and middle-income countries.

244 However, the association between neglect and depression was the same across countries.

245 Physical abuse and neglect were also associated with double the odds of developing  
246 behavioural and conduct disorders during childhood. Suicidal behaviour increased with  
247 exposure to physical and emotional abuse, as well as neglect. They also found a higher risk of  
248 alcohol misuse and dependence and to a lesser extent drug use. They found an increase in  
249 risky sexual behaviours and Sexually Transmitted Infections (physical abuse OR=1.78, 95%  
250 CI 1.50-2.10; emotional abuse OR=1.75, 95% CI- 1.49-2.04; neglect OR=1.57, 95% CI 1.39-  
251 1.78). There was an increased risk of current smoking associated with a history of emotional  
252 (OR=1.70, 95% CI 1.55-1.87) and physical (OR=1.55, 95% CI=1.09-2.21) abuse; and an  
253 increased risk of obesity associated with physical (OR=1.32, 95% CI 1.06-1.64) and  
254 emotional (1.24, 95% CI 1.13-1.36) abuse. The evidence for other associations with physical  
255 health problems, such as cardiovascular disease and cancer, was weak.

256 Jones et al. [23] reviewed the risk of violence against children living with disabilities. Of the  
257 17 papers that are included in the meta-analysis, 11 included risk estimates and 16 included



258 prevalence rates of violence exposure. The sample sizes were 13,505 children and 14,721  
259 children, respectively. Violence was defined as physical violence, sexual violence, emotional  
260 abuse, neglect and any combination of those. They founded that children with disabilities  
261 were at increased risk of abuse and neglect in comparison to non-disabled children  
262 (OR=3.68, 95% CI 2.56–5.29). The pooled prevalence of violence against children with  
263 disabilities was 26.7% (95% CI 13.8-42.1); this analysis did not include a control group to  
264 allow comparison of the prevalence of violence exposure in disabled versus non-disabled  
265 children. There were high levels of heterogeneity due to type of reporting, study setting and  
266 type of disability.

267 Winokur et al. [24] was the only high quality paper not in the ‘Body & Mind’ category. The  
268 authors reviewed papers that compared outcomes for children removed from home due to  
269 abuse or neglect who were subsequently placed in kinship care versus non-kin foster care.  
270 102 papers were included, with a total number of 666,615 children. Most of the included  
271 studies were conducted in the USA, with the rest conducted in Spain, Norway, Ireland, Israel,  
272 Sweden, the Netherlands and Australia. They reported that children placed in kinship care  
273 after suffering abuse or neglect had fewer behavioural problems (standardised mean  
274 difference= -0.33, 95% CI -0.49 to -0.17), fewer mental health disorders (OR=0.51, 95% CI  
275 0.42-0.62) and better wellbeing (OR=0.50, 95% CI 0.38- 0.64), than children placed in non-  
276 kin foster care.

277 The findings of these high-quality papers are mapped onto the bio-ecological model in Figure  
278 4.

279 **Figure 4. Model of interactions of factors. Key- 1) Bailey et al 2) Castellvi et al 3) Fusar-**  
280 **Poli 4) Jones et al 5) Norman et al 6) Winokur et al**

## 281 **Findings of medium quality studies**

282 There were 46 medium quality papers. Within the ‘Mind and Body’ category 20 had the  
283 subtheme ‘Mental Health and Substance Use and Misuse’, eight had the subtheme ‘Physical  
284 Health, and one had the subtheme ‘Brain Structure, Neurodevelopment, Cognition and  
285 Personality’. In the category ‘Social Factors’, six papers explored the subtheme  
286 ‘Relationships, Parenting, Sexual Behaviour’ and four studied the theme ‘Offending and  
287 Antisocial Behaviour’. ‘Environmental Risk Factors’ were investigated by two studies. The  
288 subthemes ‘Resilience Factors’ and ‘Education/ Adult Economic Status’ had one study each.  
289 Thirty-two papers investigated more than one type of abuse or neglect, 12 concentrated on  
290 sexual abuse, one on physical abuse and one on emotional abuse. The quality rating of these  
291 studies was mainly influenced by the lack of a rigorous risk of bias assessment, or a failure to  
292 include the assessment outcome in the analysis of results.

293 A supplementary table (S3) includes a summary of the papers, including suggestive findings.

## 294 **Discussion**

295 From our review of the literature, we can confidently identify five hallmarks of abuse and  
296 neglect in childhood.

- 297 1. Increased risk of psychopathology;
- 298 2. Increased risk of obesity;
- 299 3. Increased risk of participating in high risk sexual behaviours
- 300 4. Increased risk of smoking.
- 301 5. Increased risk of abuse and neglect in children with disabilities

302

303 There is ample evidence for poorer physical and mental health outcomes for adults who have  
304 experienced abuse and neglect and we tentatively suggest that smoking, obesity and possibly  
305 risky sexual behaviours might be mediators for this. Certainly smoking and obesity are  
306 associated with a number of physical impairments and premature death [25].

307 There may also be an argument that resilience could be a sixth hallmark. In all the studies  
308 included in this review, there were participants who had been exposed to the study condition  
309 who had not developed the measured behaviours or outcomes. However given that there was  
310 no direct high quality study looking at resilience per se it is not possible to say if these  
311 children had in fact experienced no long term negative outcome from their exposure to abuse  
312 and neglect, or if certain adverse outcomes which may have been present had simply not been  
313 measured. There is a need for researchers to consider designing high quality studies which  
314 examine resilience directly as a carefully defined and measured outcome variable.

315 There is good evidence that having a disability is a risk factor for experiencing abuse and  
316 neglect [23] This is an important focus for future research: it is often assumed that  
317 developmental problems are the *result* of abuse and neglect, but we have found this not to be  
318 the case, at least for symptoms of neurodevelopmental problems such as ADHD and Autism  
319 [26, 27].

320 There may be a mediating effect on the outcomes of abuse and neglect in children who are  
321 placed in kinship care versus foster care, although there is insufficient evidence to state this  
322 categorically since children placed in kinship versus non-relative foster care could have had  
323 different levels of psychopathology in the first place. Further research in this area is  
324 suggested.

325 Despite the burgeoning number of studies on the effects of abuse and neglect in childhood,  
326 there remains a fundamental issue with the quality of much of the literature, across both

327 systematic reviews and meta-analysis. Of the 178 studies included in this review only 3%  
328 were rated as high quality using the AMSTAR tool and only a further 27% managed a  
329 moderate quality rating.

330 There is currently no agreed standard with relation to how studies report their exposures and  
331 outcomes. For example, in considering the types of abuse and neglect (or adverse childhood  
332 experiences more widely) which study participants have been exposed to, some authors  
333 report this precisely, allowing for replication in further studies, however many do not. This  
334 makes synthesis of outcome findings challenging if not impossible and decreases the  
335 likelihood of findings emerging consistent with types of abuse and neglect. Adoption of an  
336 agreed standard in terms of the reporting of exposure to abuse and neglect in study  
337 participants, and of commonly-measured outcomes, would help increase the quality of future  
338 meta-analysis, and perhaps make possible a network study which may help unravel the  
339 complexity of the underlying interactions between variables.

340 Similarly, there remains a common difficulty in establishing causal relationships between  
341 abuse and neglect and outcomes, associated with the frequent reliance on retrospective adult  
342 self-reports of childhood abuse and neglect. Baldwin and colleagues [7] have shown that  
343 agreement between prospective and retrospective measures of abuse is poor.

344 A major oversight in the extant research on abuse and neglect is the fact that we were able to  
345 find no review linking different factors across domains or considering multiple levels of the  
346 bio-ecological model. The potential for interactions between factors across domains is  
347 therefore not addressed at all in the large number of “silo” studies reviewed here. A high  
348 level of complexity is inevitable when biological systems relevant to abuse and neglect have  
349 such diverse purposes, components and actions, yet are intimately related in their functioning  
350 - as is true, for example, for the hypothalamic-pituitary-adrenal-axis and the immune system.

351 Methodologies adapted for complex systems are therefore crucial if we are to advance in this  
352 field. For more information on this see Ioannidis and colleagues [11]. Questions such as  
353 “how do physical factors affect mental health factors?” are not considered. Of the papers  
354 reviewed, only one high quality review looked at mediating or moderating factors (kinship  
355 care) that might link childhood abuse and neglect with outcomes.

356 We found no high-quality reviews considering the potential impact which social relationships  
357 (either positive or negative) might have on the manifestations of effects of abuse and neglect.  
358 This may be a challenging area in which to work as social relationships could be seen as  
359 cause, confounder and outcome. The same would be true of other outer aspects of the Bio-  
360 Ecological model such as the impact of social policy and state actions. We can make no  
361 comment on the effects of the outer layers of the bio-ecological model since there is virtually  
362 no evidence available, here, at present. This area has not been studied in any detail and  
363 requires further consideration from researchers.

364 Examining the gaps, there is clearly a need for future researchers in this field to consider  
365 study designs that embrace complexity if crucial unanswered questions, especially about  
366 causality and mechanisms, are to be addressed. This is no truer than around the question of  
367 resilience. Given the lack of focus on resilience the reviews we have examined, we are not  
368 able to answer any questions in relation to how to prevent adverse outcomes in children  
369 exposed to abuse and neglect. This is an area of research which we would argue requires  
370 urgent attention.

371 Finally, there were no studies which reliably addressed the potential significance of the  
372 timeline of exposure to abuse and neglect in relation to the developmental stage of the child.  
373 For example, questions have not been answered regarding whether there are ages or stages of

374 development during which there is more or less risk for the development of certain outcomes  
375 of abuse and neglect.

376 This study aimed to elucidate hallmarks of abuse and neglect robustly evidenced across  
377 multiple high-quality studies. In terms of limitations, our hallmarks are confined to human  
378 studies rather than across taxa as in the hallmarking work on aging and cancer. Whilst there  
379 are animal models of early life stress, we were looking more specifically at effects of abuse  
380 and neglect which is not readily distinguished from other sources of early stress in animal  
381 models. Secondly, our conclusions are based on the quality of systematic review articles and  
382 meta-analyses rather than on the underlying primary research. **There might be undetected**  
383 **hallmarks based on high quality individual studies that we missed because they haven't been**  
384 **systematically reviewed or because the systematic review was poorly done.** Our search was  
385 limited to articles in English, and by limiting our search to systematic reviews we may have  
386 omitted relevant findings in the “grey literature”. We did consider undertaking a network  
387 analysis however this was not possible due to the heterogeneity of outcomes and study  
388 parameters. Indeed, this heterogeneity may also have impacted our identification of  
389 hallmarks since it is likely to have limited the potential for meta-analysis.

390

## 391 **Conclusions**

392 **We believe that we have, for the first time, demonstrated five hallmarks of abuse and neglect.**

393 It may be that resilience represents a sixth hallmark however further research is required to  
394 confirm this.

395 There are clear gaps in the literature, for example there is **little research** on certain biological  
396 factors and virtually no research on wider societal factors such as the quality of  
397 neighbourhoods. These gaps must be addressed if progress is to be made in understanding

398 the impact, and mechanisms of impact, of abuse and neglect and, perhaps more importantly,  
399 understanding how to protect abused and neglected children from adverse outcomes.

400 Using study designs that embrace complexity, in order to examine inter-relationships within  
401 and across the bio-ecological model, is likely to be key in answering some of these  
402 outstanding questions. Future studies need to be adequately designed and powered to achieve  
403 this.

404

## 405 **Acknowledgements**

406 We are grateful for the contributions of Evi Bali, Encrico Venturini, Emily Roberts, Pablo  
407 Barrera, Lilliane Bills, Makhib Choudkhuri, Orla Macpherson, and Rachel Whyte to the  
408 double rating of papers. We are also grateful to Irene O'Neill for administrative support.

409

410

411

## 412 **References**

- 413 1. Felitti VJ, Anda RF, Nordenberg D, Williamson DF, Spitz AM, Edwards V, et al.  
414 Relationship of Childhood Abuse and Household Dysfunction to Many of the Leading  
415 Causes of Death in Adults: The Adverse Childhood Experiences (ACE) Study. *American*  
416 *Journal of Preventive Medicine*. 1998;14(4):245-58. doi: 10.1016/S0749-3797(98)00017-8.
- 417 2. Ashton K, Bellis M, Hughes K. Adverse childhood experiences and their association  
418 with health-harming behaviours and mental wellbeing in the Welsh adult population: a  
419 national cross-sectional survey. *The Lancet*. 2016;388:S21-S. doi: 10.1016/S0140-  
420 6736(16)32257-7.
- 421 3. Mobilizing Action for Resilient C. Mobilizing Action for Resilient Communities  
422 through policy and advocacy: A toolkit for trauma-informed, cross-sector networks.  
423 Philadelphia, PA: Health Federation of Philadelphia, 2019 Contract No.: Report.
- 424 4. Nemeroff Charles b. Paradise Lost: The Neurobiological and Clinical Consequences  
425 of Child Abuse and Neglect. *Neuron*. 2016;89(5):892-909. doi:  
426 10.1016/j.neuron.2016.01.019.
- 427 5. Lacey RE, Minnis H. Practitioner Review: Twenty years of research with adverse  
428 childhood experience scores – Advantages, disadvantages and applications to practice.  
429 *Journal of Child Psychology and Psychiatry*. 2020;61(2):116-30. doi: 10.1111/jcpp.13135.
- 430 6. Lang J, McKie J, Smith H, McLaughlin A, Gillberg C, Shiels PG, et al. Adverse  
431 childhood experiences, epigenetics and telomere length variation in childhood and beyond: a  
432 systematic review of the literature. *European child & adolescent psychiatry*. 2019. doi:  
433 10.1007/s00787-019-01329-1.



- 434 7. Baldwin JR, Reuben A, Newbury JB, Danese A. Agreement Between Prospective and  
435 Retrospective Measures of Childhood Maltreatment: A Systematic Review and Meta-  
436 analysis. *JAMA psychiatry*. 2019;76(6):584. doi: 10.1001/jamapsychiatry.2019.0097.
- 437 8. Bronfenbrenner U. Making human beings human: Bioecological perspectives on  
438 human development. Bronfenbrenner U, editor. Thousand Oaks, CA: Sage Publications Ltd;  
439 2005. xxix, 306-xxix, p.
- 440 9. Hanahan D, Weinberg Robert a. Hallmarks of Cancer: The Next Generation. *Cell*.  
441 2011;144(5):646-74. doi: 10.1016/j.cell.2011.02.013.
- 442 10. Del Giudice M, Ellis BJ, Shirtcliff EA. The Adaptive Calibration Model of stress  
443 responsivity. *Neuroscience and biobehavioral reviews*. 2011;35(7):1562-92. doi:  
444 10.1016/j.neubiorev.2010.11.007.
- 445 11. Ioannidis K, Askelund AD, Kievit RA, Van Harmelen A-L. The Complex  
446 Neurobiology of Resilient Functioning After Child Maltreatment. *BMC Medicine*. 2020;(In  
447 Press). doi: 10.1186/s12916-020-1490-7.
- 448 12. Kalisch R, Cramer AOJ, Binder H, Fritz J, Leertouwer I, Lunansky G, et al.  
449 Deconstructing and Reconstructing Resilience: A Dynamic Network Approach. *Perspectives*  
450 *on Psychological Science*. 2019;14(5):765-77. doi: 10.1177/1745691619855637.
- 451 13. Gough D, Oliver S, Thomas J. An introduction to systematic reviews. Second edition..  
452 ed: London : SAGE; 2017.
- 453 14. Montori VM, Wilczynski NL, Morgan D, Haynes RB. Optimal search strategies for  
454 retrieving systematic reviews from Medline: analytical survey. *British Medical Journal*  
455 *Publishing Group*; 2005. p. 68.
- 456 15. Wilczynski NL, Haynes RB. EMBASE search strategies achieved high sensitivity and  
457 specificity for retrieving methodologically sound systematic reviews. *Journal of clinical*  
458 *epidemiology*. 2007;60(1):29-33. doi: 10.1016/j.jclinepi.2006.04.001.

- 459 16. Eady AM, Wilczynski NL, Haynes RB. PsycINFO search strategies identified  
460 methodologically sound therapy studies and review articles for use by clinicians and  
461 researchers. *Journal of clinical epidemiology*. 2008;61(1):34-40. doi:  
462 10.1016/j.jclinepi.2006.09.016.
- 463 17. Moher D, Liberati A, Tetzlaff J, Altman DG. Preferred reporting items for systematic  
464 reviews and meta-analyses: the PRISMA statement. *British Medical Journal Publishing*  
465 *Group*; 2009.
- 466 18. Shea BJ, Reeves BC, Wells G, Thuku M, Hamel C, Moran J, et al. AMSTAR 2: A  
467 critical appraisal tool for systematic reviews that include randomised or non-randomised  
468 studies of healthcare interventions, or both. *BMJ*. 2017;358:j4008. doi:  
469 doi:10.1136/bmj.j4008
- 470 19. FusarPoli P, Tantardini M, De Simone S, RamellaCravaro V, Oliver D, Kingdon J, et  
471 al. Deconstructing vulnerability for psychosis: Meta-analysis of environmental risk factors  
472 for psychosis in subjects at ultra high-risk. *Psychiatrie & Psychobiologie*. 2017;40:65-75. doi:  
473 <http://dx.doi.org/10.1016/j.eurpsy.2016.09.003>.
- 474 20. Bailey T, AlvarezJimenez M, GarciaSanchez AM, Hulbert C, Barlow E, Bendall S.  
475 Childhood trauma is associated with severity of hallucinations and delusions in psychotic  
476 disorders: A systematic review and meta-analysis. *Schizophrenia bulletin*. 2018;44(5):1111-  
477 22. doi: <http://dx.doi.org/10.1093/schbul/sbx161>.
- 478 21. Castellvi P, Miranda-Mendizabal A, Pares-Badell O, Almenara J, Alonso I, Blasco  
479 MJ, et al. Exposure to violence, a risk for suicide in youths and young adults. A meta-analysis  
480 of longitudinal studies. *Acta Psychiatrica Scandinavica*. 2017;135(3):195-211. doi:  
481 <https://dx.doi.org/10.1111/acps.12679>.
- 482 22. Norman RE, Byambaa M, De R, Butchart A, Scott J, Vos T. The long-term health  
483 consequences of child physical abuse, emotional abuse, and neglect: a systematic review and

- 484 meta-analysis. PLoS Medicine / Public Library of Science. 2012;9(11):e1001349. doi:  
485 <https://dx.doi.org/10.1371/journal.pmed.1001349>.
- 486 23. Jones L, Bellis MA, Wood S, Hughes K, McCoy E, Eckley L, et al. Prevalence and  
487 risk of violence against children with disabilities: a systematic review and meta-analysis of  
488 observational studies. Lancet. 2012;380(9845):899-907. doi:  
489 [https://dx.doi.org/10.1016/S0140-6736\(12\)60692-8](https://dx.doi.org/10.1016/S0140-6736(12)60692-8).
- 490 24. Winokur M, Holtan A, Batchelder KE. Kinship care for the safety, permanency, and  
491 well-being of children removed from the home for maltreatment. Cochrane Database of  
492 Systematic Reviews. 2014;(1)-2014 Jan 31. doi:  
493 <https://dx.doi.org/10.1002/14651858.CD006546.pub3>.
- 494 25. Freedman DM SA, Rajaraman P, Doody MM, Linet MS, Ron E. The Mortality Risk  
495 of Smoking and Obesity Combined. American Journal of Preventive Medicine.  
496 2006;31(5):355-62.
- 497 26. van Der Kolk B, Ford JD, Spinazzola J. Comorbidity of developmental trauma  
498 disorder (DTD) and post-traumatic stress disorder: findings from the DTD field trial.  
499 European Journal of Psychotraumatology. 2019;10(1). doi: 10.1080/20008198.2018.1562841.
- 500 27. Dinkler L, Lundström S, Gajwani R, Lichtenstein P, Gillberg C, Minnis H.  
501 Maltreatment- associated neurodevelopmental disorders: a co- twin control analysis. Journal  
502 of Child Psychology and Psychiatry. 2017;58(6):691-701. doi: 10.1111/jcpp.12682.

503

504

505 **Supplementary Materials**

506 S1: Supplementary Data- PRISMA Checklist

507 S2: Supplementary Data- Detailed Search Strategy

508 S3: Supplementary Table- Details of medium quality articles

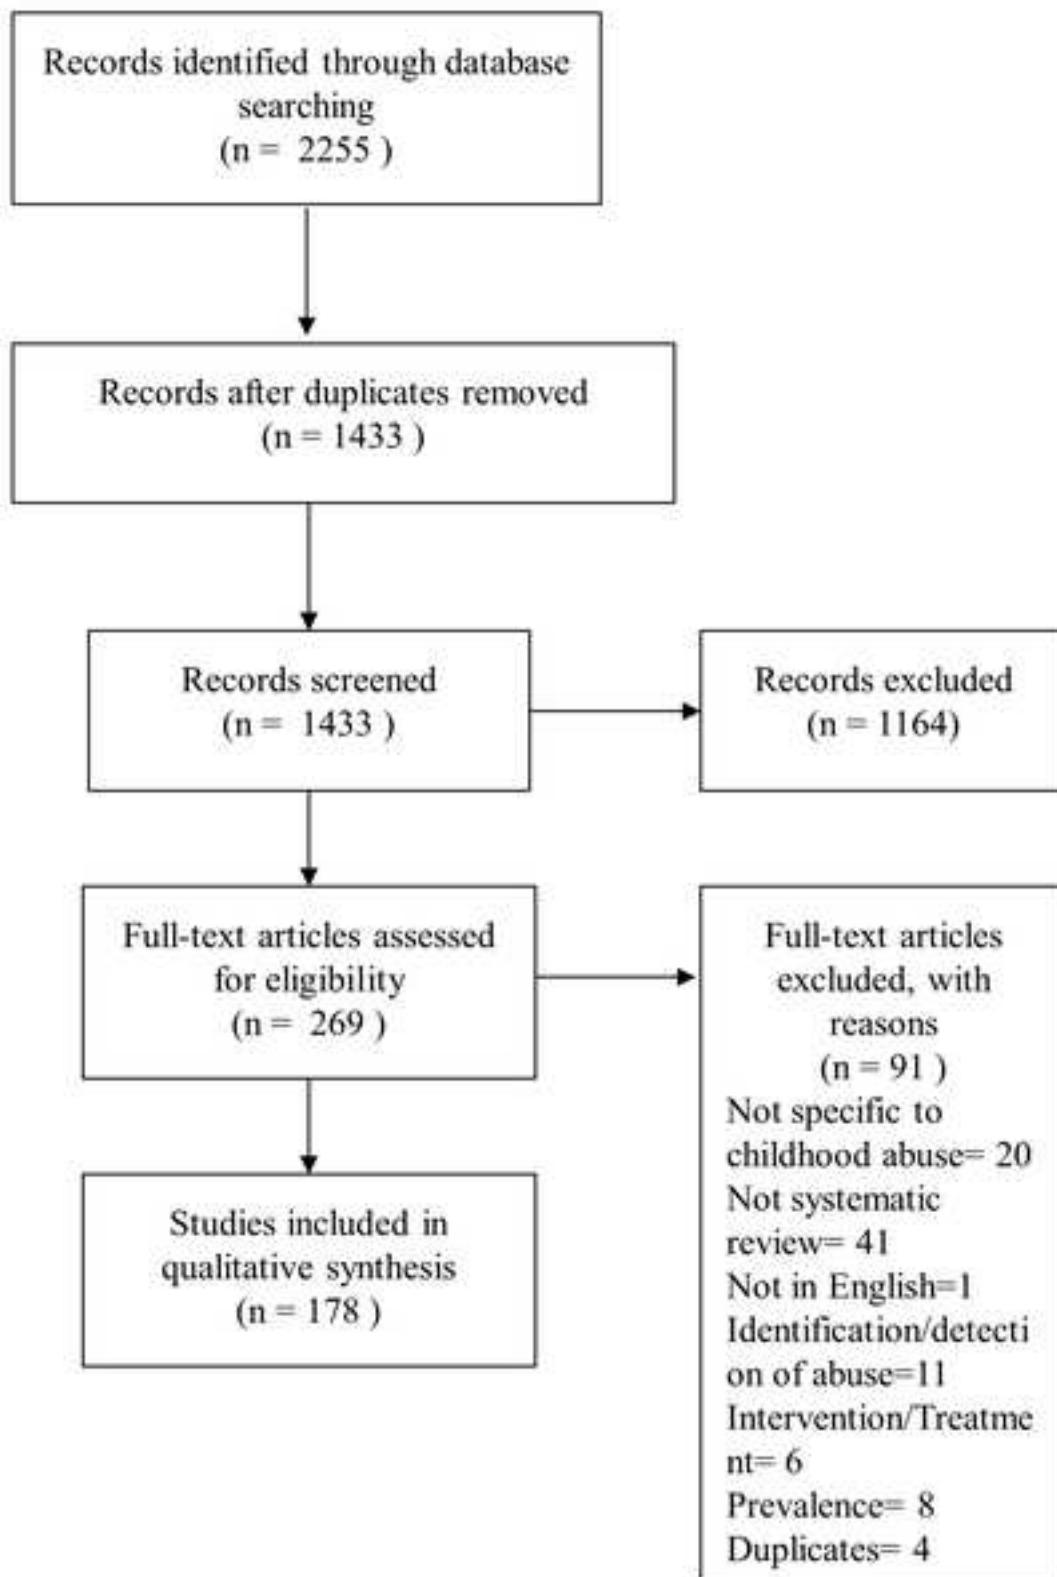

| <b>Inclusion Criteria</b>                                                                              | <b>Exclusion Criteria</b>                                                                                                                         |
|--------------------------------------------------------------------------------------------------------|---------------------------------------------------------------------------------------------------------------------------------------------------|
| Systematic Review or Meta-analysis                                                                     | Original Articles, Conference Articles, Abstracts, Posters                                                                                        |
| Documented abuse or neglect (Physical abuse, emotional abuse, sexual abuse, neglect, or a combination) | No documented abuse.                                                                                                                              |
| Measures a potential cause or consequence of abuse or neglect                                          | Studies purely concerned with the prevalence, detection, prevention or treatment of abuse which do not consider potential causes or consequences. |
| Human Participants                                                                                     | Animal Studies.                                                                                                                                   |
| Quantitative Studies (can be mixed qualitative / qualitative)                                          | Qualitative Studies                                                                                                                               |
| Published since 2009                                                                                   | Published before 2009                                                                                                                             |
| English Language                                                                                       | Not English Language                                                                                                                              |

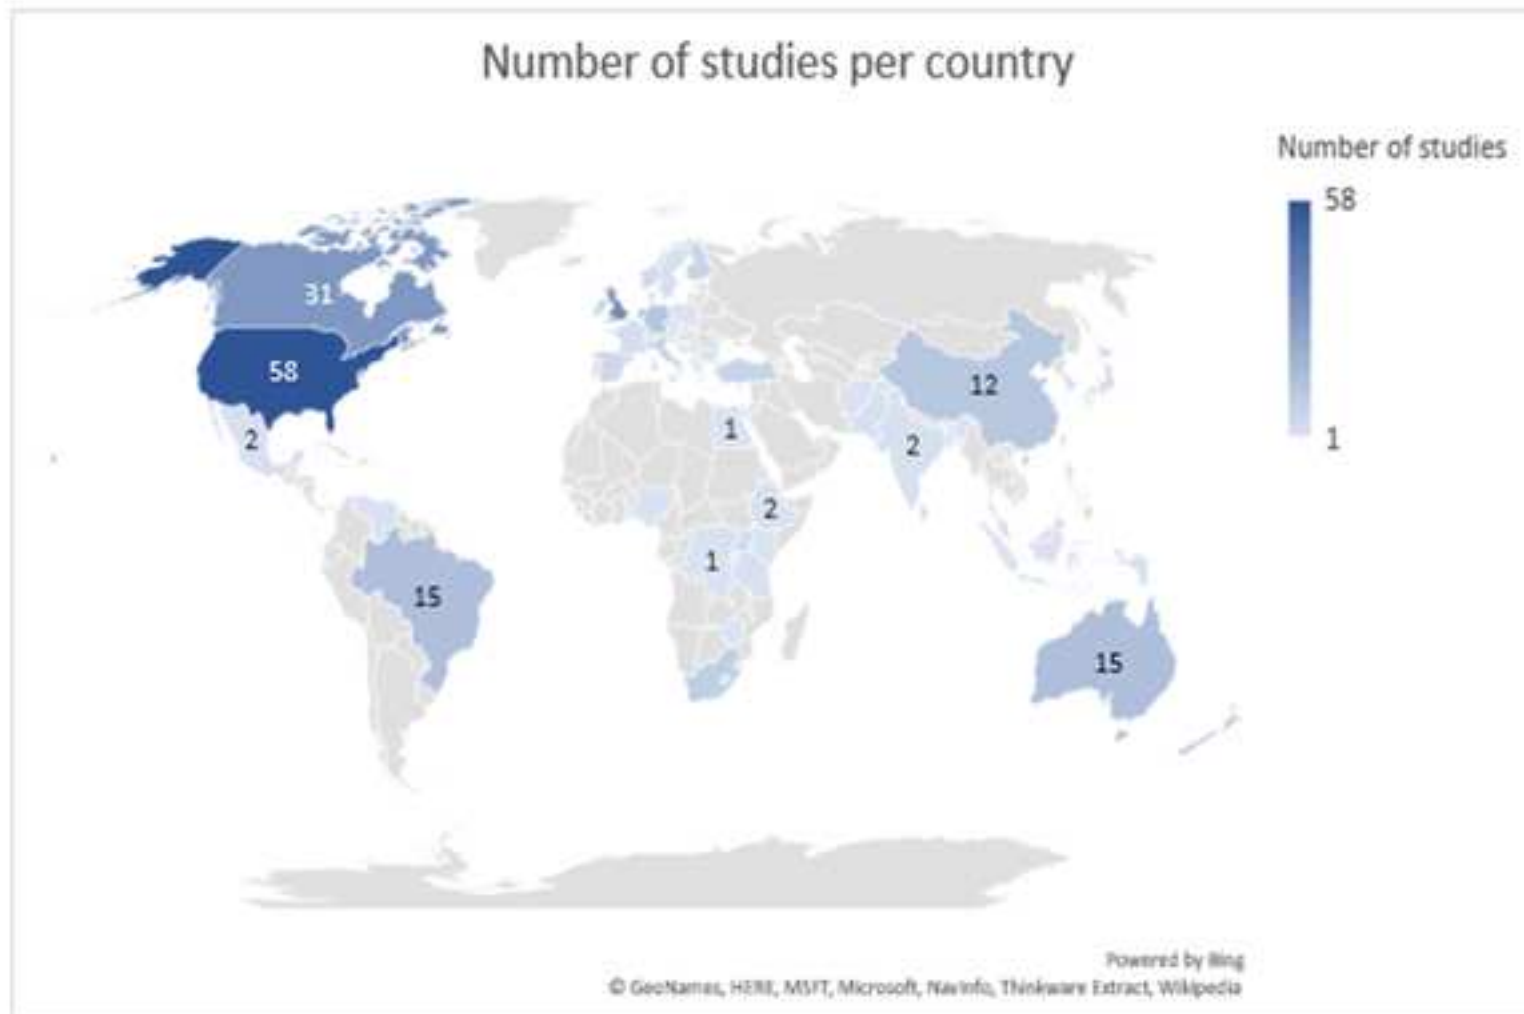

| Meta-analysis total | N=76            | Systematic Review | N=102        |
|---------------------|-----------------|-------------------|--------------|
| High Quality        | n=6<br>(7.9%)   | High Quality      | n=0 (0%)     |
| Medium Quality      | n=22<br>(28.9%) | Medium Quality    | n=24 (23.5%) |
| Low Quality         | n=48<br>(63.1%) | Low Quality       | n=78 (76.5%) |

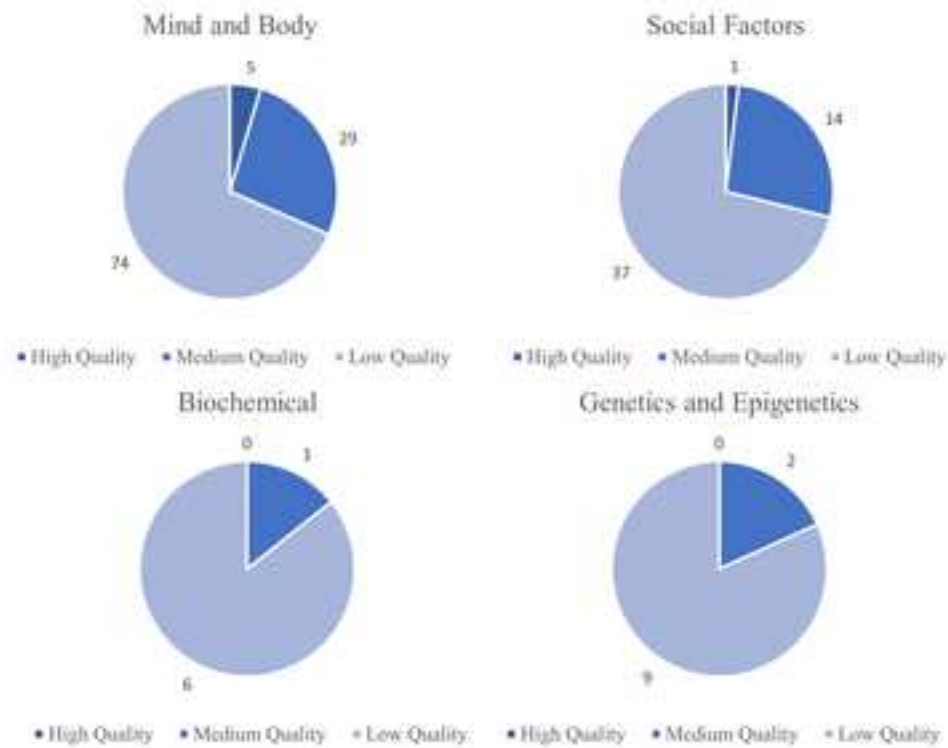



### Modelling of identified risk factors and the bio-ecological model.

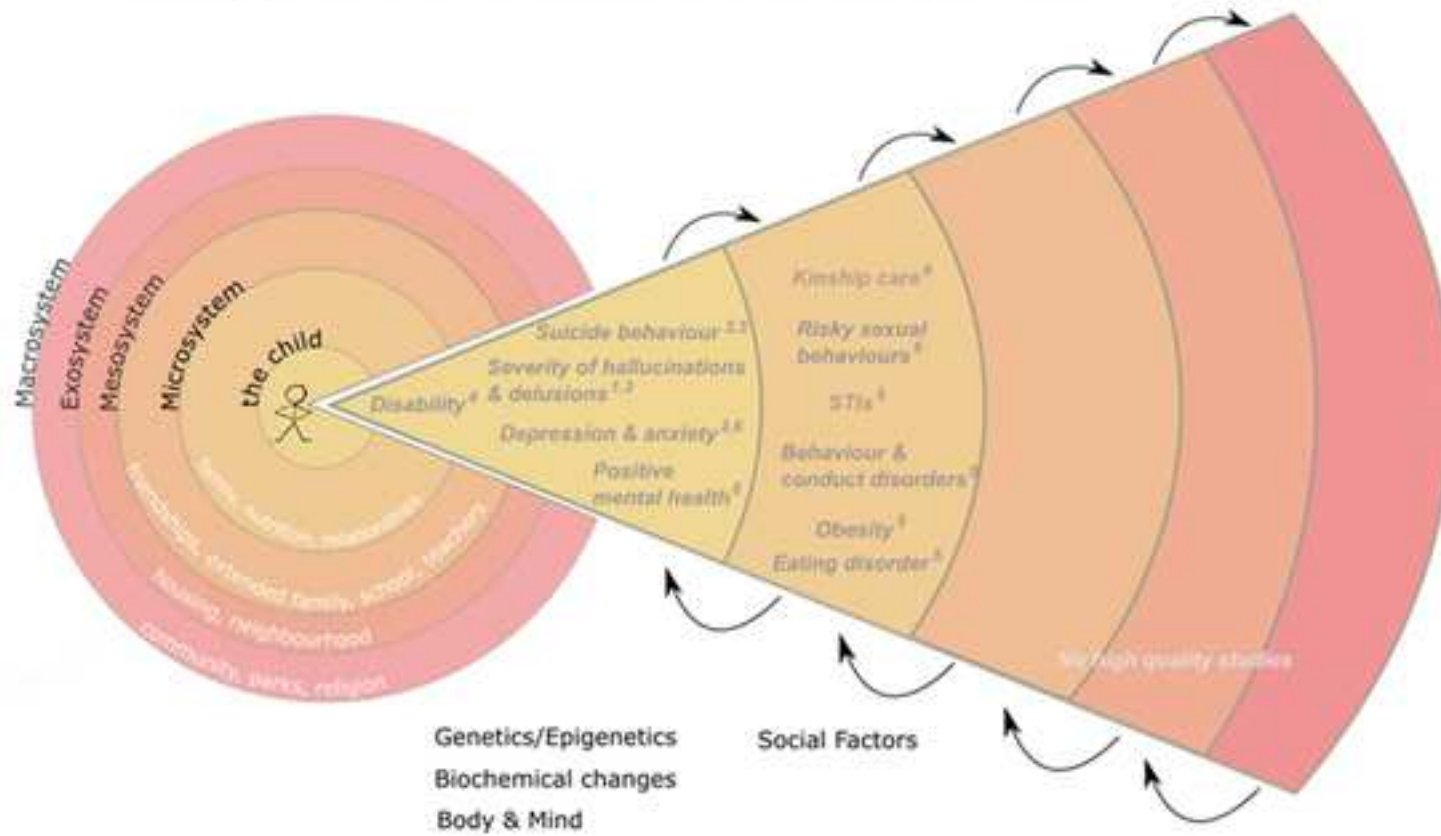

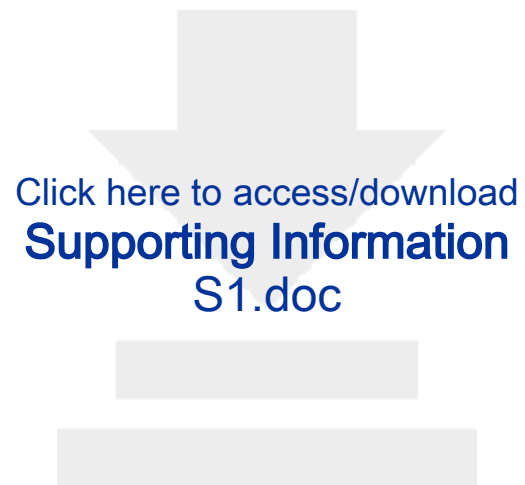

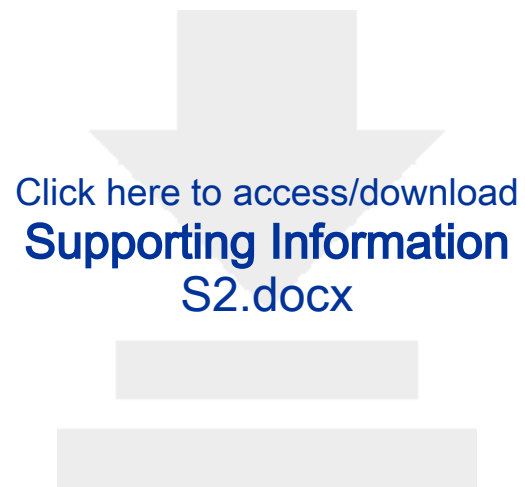

Click here to access/download  
**Supporting Information**  
S2.docx

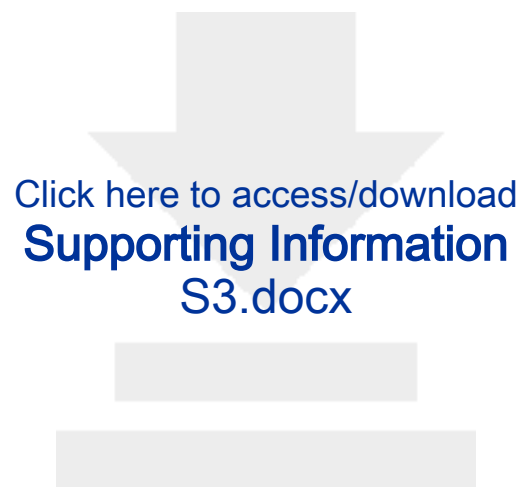

Click here to access/download  
**Supporting Information**  
S3.docx
